# Hippocampus and striatum encode distinct task regularities that guide human timing behavior

**Ignacio Polti<sup>1,2,\*</sup>, Matthias Nau<sup>1,2,3,\*</sup>, Raphael Kaplan<sup>1,4</sup>,  
Virginie van Wassenhove<sup>5</sup>, and Christian F. Doeller<sup>1,2</sup>**

<sup>1</sup>Kavli Institute for Systems Neuroscience, Centre for Neural Computation, The Egil and Pauline Braathen and Fred Kavli Centre for Cortical Microcircuits, Jebsen Centre for Alzheimer's Disease, Norwegian University of Science and Technology, Trondheim, Norway

<sup>2</sup>Max Planck Institute for Brain, Cognition & Behavior, Leipzig, Germany

<sup>3</sup>National Institute of Mental Health (NIMH), Bethesda, USA

<sup>4</sup>Department of Basic Psychology, Clinical Psychology, and Psychobiology, Universitat Jaume I, Castellón de la Plana, Spain

<sup>5</sup>CEA DRF/Joliot, NeuroSpin; INSERM, Cognitive Neuroimaging Unit; CNRS, Université Paris-Saclay, Gif-Sur-Yvette, France

*\*Shared-first authors*

## Abstract

The brain encodes the statistical regularities of the environment in a task-specific yet flexible and generalizable format. How it does so remains poorly understood. Here, we seek to understand this by converging two parallel lines of research, one centered on striatal-dependent sensorimotor timing, and the other on hippocampal-dependent cognitive mapping. We combined functional magnetic resonance imaging (fMRI) with a visual-tracking and time-to-contact (TTC) estimation task, revealing the widespread brain network supporting sensorimotor learning in real-time. Hippocampal and caudate activity signaled the behavioral feedback within trials and the improvements in performance across trials, suggesting that both structures encode behavior-dependent information rapidly. Critically, hippocampal learning signals generalized across tested intervals, while striatal ones did not, and together they explained both the trial-wise performance and the regression-to-the-mean biases in TTC estimation. Our results suggest that a fundamental function of hippocampal-striatal interactions may be to solve a trade-off between specificity vs. generalization, enabling the flexible and domain-general expression of human timing behavior broadly.

## 1 Introduction

2 When someone throws us a ball, we can anticipate its future trajectory, its speed and the time it  
3 will reach us. Our expectations then inform our motor system to plan an appropriate action to  
4 catch it. Generating expectations and planning behavior accordingly builds on our ability to learn  
5 from past experiences and to encode the statistical regularities of the tasks we perform. At the  
6 core of this ability lies a continuous perception-action loop, initially proposed for sensorimotor  
7 systems (e.g. (Wolpert et al., 2011)), which is now at the heart of many leading theories of brain  
8 function including active inference (Friston et al., 2016), predictive coding (Huang & Rao, 2011) and  
9 reinforcement learning (Daw & Dayan, 2014).

10 Critically, to guide behavior accurately in a dynamically changing environment, the brain needs to  
11 balance at least three objectives. First, it needs to capture the specific aspects of the task that in-  
12 form the relevant behavior (e.g. the remaining time to catch the ball). Second, it needs to generalize  
13 from a limited set of examples to novel and noisy situations (e.g. by inferring how fast previous  
14 balls flew on average). Third, the sensorimotor representations that guide the behavior need to be  
15 updated flexibly whenever feedback about our actions becomes available (e.g. when we catch or  
16 miss the ball), or when the task demand changes (e.g. when someone throws us a frisbee disc in-  
17 stead). Herein, we refer to these objectives as specificity, generalization and flexibility. While these  
18 are all fundamental principles underlying human cognition broadly, how we learn to balance these  
19 three objectives during ongoing behavior remains unclear.

20 An optimal behavioral domain to study these processes is sensorimotor timing (Gershman et al.,  
21 2014; Petter et al., 2018). This is because prior work in humans and non-human primates sug-  
22 gested that timing estimates indeed rely on prior experiences, based on which the temporal regu-  
23 larities and kinematic information of the task are inferred (Wolpert et al., 2011; Jazayeri & Shadlen,  
24 2010; Acerbi et al., 2012; Chang & Jazayeri, 2018). This is reflected for example in the temporal  
25 and spatial tuning properties of neurons in the caudate, a part of the striatum also implicated in  
26 associative learning, action coordination and feedback processing (Grahn et al., 2008; Foerde &  
27 Shohamy, 2011). It is the union of these functions that make the caudate a prime candidate to  
28 support specificity and flexibility in the context of timing behavior.

29 Crucially, timing estimates are not always accurate. Instead, they reflect a trade-off between speci-  
30 ficity and generalization, which is expressed in systematic behavioral biases. Estimated intervals  
31 regress towards the mean of the distribution of tested intervals (Jazayeri & Shadlen, 2010), a well-  
32 known effect that we will refer to as the regression effect (Petzschner et al., 2015). It suggests that  
33 the brain encodes a probability distribution of possible intervals rather than the exact information  
34 obtained in each trial (Wolpert et al., 2011). Timing estimates thus depend not only on the interval  
35 tested in a given trial, but also on the temporal context (i.e., the intervals tested in all other trials).  
36 This likely helps to generalize from our current experience to possible future scenarios (Jazayeri &  
37 Shadlen, 2010; Acerbi et al., 2012).

38 Important evidence for the learning of task regularities for generalization comes from a parallel  
39 line of research centered on relational memory and cognitive mapping (Behrens et al., 2018; Mo-  
40 mennejad, 2020). In particular, the hippocampus has been implicated in generalizing the structure  
41 of a task away from the individual features that were tested (Kumaran, 2012; Schlichting & Pre-  
42 ston, 2015; Schapiro et al., 2017; Wikenheiser et al., 2017; Behrens et al., 2018; Schuck & Niv, 2019;  
43 Whittington et al., 2020; Peer et al., 2021), providing a unified account for its many proposed roles  
44 in domains such as navigation (Burgess et al., 2002), memory (Schiller et al., 2015) and decision  
45 making (Kaplan et al., 2017; Vikbladh et al., 2019). Moreover, the hippocampus has been shown

46 to process behavioral feedback in decision-making tasks (Shohamy & Wagner, 2008), pointing to  
47 a potential role in feedback learning akin to the striatum. Intriguingly, this dovetails with computa-  
48 tional theories (Chersi & Burgess, 2015; Geerts et al., 2020) and empirical work on memory-guided  
49 navigation (Doeller et al., 2008; Hartley et al., 2003), which suggested a division of labor between  
50 the striatum and the hippocampus. While the former may encode specific environmental details  
51 such as landmarks, the latter may support the encoding of the general layout and geometry of the  
52 environment (Hartley et al., 2003; Doeller et al., 2008; Goodroe et al., 2018; Gahnstrom & Spiers,  
53 2020).

54 Here, we seek convergence of these ideas and research fields by testing if the same cognitive-  
55 mapping principles that govern learning in the spatial domain also apply to the time domain. Specif-  
56 ically, we investigate the relationship between hippocampal and striatal learning signals with behav-  
57 ioral performance in a fast-paced timing task, revealing how the brain flexibly updates task-relevant  
58 sensorimotor representations in real time. We explicitly focus on how the hippocampus and the  
59 striatum encode the details and the structure of a task in parallel, thus serving specificity and gen-  
60 eralization. To do so, we used functional magnetic resonance imaging (fMRI) to monitor brain  
61 activity in participants estimating the time-to-contact (TTC) between a moving fixation target and  
62 a visual boundary. We tested how brain activity reflected the ongoing task performance and the  
63 behavioral feedback received. Moreover, we characterized in detail the relationship between brain  
64 activity and the improvements in task performance over time, indeed revealing distinct roles of the  
65 hippocampus and striatum in encoding different task regularities in parallel. While the caudate en-  
66 coded task-relevant information that were specific to each TTC interval tested, the hippocampus  
67 generalized across intervals, signaling learning independent of TTC. Intriguingly, because learning  
68 occurred in real time when behavioral feedback is received, the corresponding activity we observed  
69 in the hippocampus goes beyond its well-known role in (long-term) episodic memory (Schiller et al.,  
70 2015). We conclude by proposing that the fundamental and domain-general function of striatal-  
71 hippocampal interactions may be finding the trade-off between specificity and generalization to  
72 guide human behavior broadly.

## 73 Results

74 In the following, we will present our experiment and results in four steps. First, we introduce the  
75 TTC-task as well as the behavioral and fMRI measurements we acquired. Second, we show that the  
76 activity in a large network of regions reflects the behavioral feedback participants received in the  
77 current and in the previous trial, and we demonstrate that this network centers on the hippocam-  
78 pus and the caudate as predicted. These results provide evidence for the proposed role of these  
79 structures in rapid feedback learning. Third, we show that the feedback modulation in both struc-  
80 tures reflects improvements in behavioral performance over trials and thus that the learning was  
81 effective and rapid. Critically, while the caudate signaled behavioral improvements specific to the  
82 TTC interval tested in a given trial, the hippocampus generalized across TTC's, signaling behavioral  
83 improvements independent of which TTC interval was tested. Voxel-wise analyses further revealed  
84 a striking distinction between striatal sub-regions and across a larger brain network. Finally, we  
85 show that caudate activity scaled with trial-wise behavioral performance, whereas hippocampal ac-  
86 tivity scaled with both the performance and the regression effect observed in behavior. Together,  
87 these results suggest that the hippocampus and the striatum update distinct information about  
88 the task in parallel, supporting the flexible, specific and generalizable expression of sensorimotor  
89 timing behavior in humans.

## 90 Time-to-contact (TTC) estimation task

91 We monitored whole-brain activity using fMRI with concurrent eye tracking in 34 participants per-  
 92 forming a TTC task. This task offered a rich behavioral read-out and required sustained attention in  
 93 every single trial. During scanning, participants visually tracked a fixation target, which moved on  
 94 linear trajectories within a circular boundary. The target moved at one of four possible speed levels  
 95 and in one of 24 possible directions (Fig. 1A, similar to Nau et al. (2018a)). The sequence of tested  
 96 speeds was counterbalanced across trials. Whenever the target stopped moving, participants esti-  
 97 mated when the target would have hit the boundary if it had continued moving. They did so while  
 98 maintaining fixation, and they indicated the estimated TTC by pressing a button. Feedback about  
 99 their performance was provided foveally and instantly with a colored cue. The received feedback  
 100 depended on the timing error, i.e. the difference between objectively true and estimated TTC (Fig.  
 101 1B, Fig. S1), and it comprised 3 levels reflecting high, middle and low accuracy (Fig. 1C). Because  
 102 timing judgements typically follow the Weber-Fechner law (Rakitin et al., 1998), the feedback levels  
 103 were scaled relative to the ground-truth TTC of each trial. This ensured that participants were ex-  
 104 posed to approximately the same distribution of feedback at all intervals tested (Fig. 1C, Fig. S1B).  
 105 After a jittered inter-trial interval (ITI), the next trial began and the target moved into another direc-  
 106 tion at a given speed. The tested speeds of the fixation target were counterbalanced across trials to  
 107 ensure a balanced sampling within each scanning run. Because the target always stopped moving  
 108 at the same distance to the boundary, matching the boundary's retinal eccentricity across trials,  
 109 the different speeds led to four different TTCs: 0.55, 0.65, 0.86 and 1.2 seconds. Each participant  
 110 performed a total of 768 trials. Please see Methods for more details.

### A) Visual tracking & time-to-contact (TTC) estimation

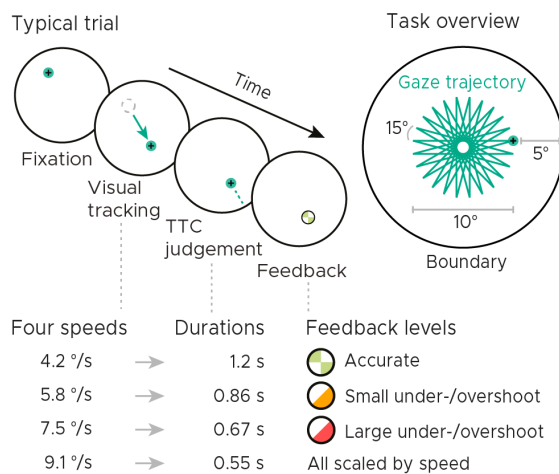

### B) TTC-task performance

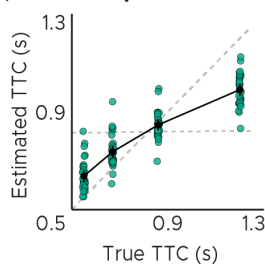

### C) Received feedback

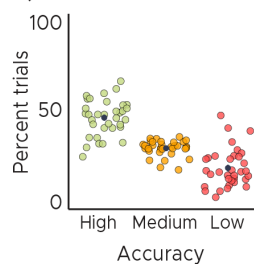

**Figure 1: Visual tracking and Time-To-Contact (TTC) estimation task.** A) Task design. In each trial during fMRI scanning, participants fixated a target (phase 1), which started moving at one of 4 possible speeds and in one of 24 possible directions for 10° visual angle (phase 2). After the target stopped moving, participants kept fixating and estimated when the fixation target would have hit a boundary 5° visual angle apart (phase 3). After pressing a button at the estimated TTC, participants received feedback (phase 4) according to their performance. Feedback was scaled relative to target TTC. B) Task performance. True and estimated TTC were correlated, showing that participants performed the task well. However, they overestimated short TTCs and underestimated long TTCs. Their estimates regressed towards the grand-mean of the TTC distribution (horizontal dashed line), away from the line of equality (diagonal dashed line). C) Feedback. On average, participants received high-accuracy feedback on half of the trials (also see Fig. S1B). BC) We plot the mean and SEM (black dots and lines) as well as single-participant data as dots. Feedback levels are color coded.

111 Analyzing the behavioral responses revealed that participants performed the task well and that

112 the estimated and true TTCs were tightly correlated (Fig. 1B, Spearman's  $\rho = 0.91, p = 2.2 \times 10^{-16}$ ).  
113 However, participants' responses were also systematically biased towards the grand mean of the  
114 TTC distribution (0.82 seconds), indicating that shorter durations tended to be overestimated and  
115 longer durations tended to be underestimated. This regression effect has been argued to show  
116 that timing estimates indeed rely on the statistical task regularities that our brain has encoded  
117 (e.g. Jazayeri & Shadlen (2010)). The regression effect may thus reflect a key behavioral adaptation  
118 which helps to generalize from current experiences to future scenarios. Visualizing the timing error  
119 over trials and scanning runs showed that participants' task performance improved over time (Fig.  
120 S1C; linear mixed-effects model with run as fixed effect and participants as the error term,  $F(3) =$   
121  $3.2944, p = 0.024, \epsilon^2 = 0.06, CI : [0.00, 0.13]$ ), indicating learning over the course of the experiment.

## 122 Behavioral feedback predicts hippocampal and striatal activity in subsequent trial

123 Learning is expected to occur right after the value of the performed action became apparent, which  
124 is when participants received feedback. As a first proxy for learning, we thus analyzed how the activi-  
125 ty in each voxel reflected the feedback participants received in each trial. Using a mass-univariate  
126 general linear model (GLM), we modeled the three feedback levels with one regressor each (high,  
127 medium, low), with additional nuisance regressors reflecting the 6 realignment parameters, the  
128 inter-trial-interval (ITI), button presses, and periods of rest in the middle as well as at the end of each  
129 run. We then contrasted the beta weights estimated for high-accuracy and low-accuracy feedback  
130 and examined the effects averaged across runs on the group-level using two-tailed one-sample  
131 t-tests.

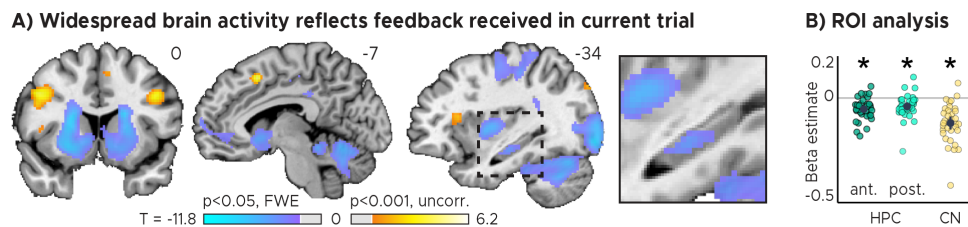

**Figure 2: Feedback on the previous trial (n-1) modulates network-wide activity and hippocampal connectivity in subsequent trials (n).** A) Voxel-wise analysis. Activity in each trial was modeled with a separate regressor as a function of feedback received in the previous trial. Insert zooming in on hippocampus added. B) Independent regions-of-interest analysis for the anterior (ant. HPC) and posterior (post. HPC) hippocampus as well as the caudate nucleus (CN). We plot the beta estimates obtained for the parametric modulator modeling trial-wise activity as a function of feedback in previous trial. Negative values indicate a negative relationship between feedback valence and brain activity. Depicted are the mean and SEM across participants (black dot and line) overlaid on single participant data (coloured dots). Activity in the anterior hippocampus and in the caudate is modulated by feedback received in previous trial. Statistics reflect  $p < 0.05$  at Bonferroni-corrected levels (\*) obtained using a group-level two-tailed one-sample t-test against zero. C) Feedback-dependent hippocampal connectivity. We plot results of a psychophysiological interactions (PPI) analysis conducted using the hippocampal peak effects in (A) as a seed. AC) We plot thresholded t-test results at 1mm resolution overlaid on a structural template brain. MNI coordinates added. Hippocampal activity and connectivity is modulated by feedback received in the previous trial.

132 Intriguingly, a voxel-wise analysis revealed that activity in the thalamus, striatum and the hippocam-  
133 pus could be predicted by the feedback participants received just before the trial had started  
134 (Fig. 2A). Higher-accuracy feedback led to overall stronger activity in these regions. Regions-of-  
135 interest analyses further localized this feedback-dependent activity to the caudate and the ante-  
136 rior section of the hippocampus (Fig. 2B, Fig. S2; two-tailed one-sample  $t$  tests: anterior HPC,  
137  $t(33) = -3.80, p = 5.9 \times 10^{-4}, p_{fwe} = 0.002, d = -0.65, CI : [-1.03, -0.28]$ ; posterior HPC,  $t(33) = -1.60, p =$   
138  $0.119, p_{fwe} = 0.357, d = -0.27, CI : [-0.62, 0.07]$ ; caudate,  $t(33) = -5.85, p = 1.5 \times 10^{-6}, p_{fwe} = 4.5 \times 10^{-6}, d =$   
139  $-1.00, CI : [-1.43, -0.59]$ ). Note that there was no systematic and predictable relationship between

140 subsequent trials on a behavioral level (Fig. S1A;  $t(33) = 1.03, p = 0.312, d = 0.18, CI : [-0.17, 0.52]$ )  
141 and that the direction of the effects differed across regions (Fig 2A), speaking against a feedback-  
142 dependent bias in attention.

### 143 **Feedback-dependent hippocampal functional connectivity**

144 Having established that both the caudate and the hippocampus reflected feedback in the TTC task,  
145 we reasoned that the two structures may show systematic co-fluctuations in activity as well. To test  
146 this, we estimated the functional connectivity of a 4 mm radius sphere centered on the hippocam-  
147 pal peak main effect ( $x=-32, y=-14, z=-14$ ) using a seed-based psychophysiological interaction (PPI)  
148 analysis. The PPI main regressor reflected the element-by-element product of the task time course  
149 and the hippocampal peak voxel time course used as a seed. Separate nuisance regressors mod-  
150 elled the main effect of previous feedback and the physiological signal correlations between the  
151 seed region and all other voxels.

152 We reasoned that larger timing errors and thus low-accuracy feedback would result in stronger  
153 learning compared to smaller timing errors and high-accuracy feedback, a relationship that should  
154 also be reflected in the functional connectivity between the hippocampus and other regions. We  
155 specifically tested this using the PPI analysis by contrasting trials in which participants performed  
156 poorly compared to those trials in which they performed well.

157 We found that hippocampal activity indeed co-fluctuated with activity in the caudate in a feedback-  
158 dependent manner (two-tailed one-sample  $t$  test:  $t(33) = -5.85, p = 4.7 \times 10^{-4}, d = 0.67, CI : [0.29, 1.05]$ ).  
159 These co-fluctuations were stronger when participants received low-accuracy feedback compared  
160 to when they received high-accuracy feedback. Interestingly, however, we also observed such co-  
161 fluctuations between the hippocampus and other regions that were likely task-relevant. These  
162 regions included the primary motor cortex, the parahippocampus and medial parietal lobe as well  
163 as the cerebellum (Fig. 2C).

### 164 **Widespread brain activity reflects behavioral feedback in current trial**

165 The results presented so far indicate that hippocampal functional connectivity, as well as the activity  
166 in the caudate and the hippocampus reflect feedback received in the previous trial. To test if the  
167 activity in these regions also predicted the performance in the current trial, we next conducted  
168 a GLM analysis in which we parametrically modeled the time course of each voxel and trial as a  
169 function of the feedback received at the end of the trial. Nuisance variance was accounted for  
170 using the same nuisance regressors as before.

171 A voxel-wise group-analysis for our regressors-of-interest showed that indeed a large network of  
172 regions signaled the performance in the current trial, which included the striatum, thalamus, cere-  
173 bellum, lateral occipital cortex, motor cortex, insula, frontal eye fields as well as the hippocampus  
174 (Fig. 3A). We again confirmed that these effects were present in the hippocampus and the cau-  
175 date using an independent regions-of-interest analysis (Fig. 3B, Fig. S2; two-tailed one-sample  
176  $t$  tests: anterior HPC,  $t(33) = -5.92, p = 1.2 \times 10^{-6}, p_{fwe} = 3.7 \times 10^{-6}, d = -1.02, CI : [-1.45, -0.60]$ ;  
177 posterior HPC,  $t(33) = -4.07, p = 2.7 \times 10^{-4}, p_{fwe} = 8.2 \times 10^{-4}, d = -0.70, CI : [-1.09, -0.32]$ ; caudate,  
178  $t(33) = -7.56, p = 1.1 \times 10^{-8}, p_{fwe} = 3.2 \times 10^{-8}, d = -1.30, CI : [-1.78, -0.85]$ ).

179 Because each trial comprised multiple distinct phases, ranging from tracking the moving target over  
180 estimating the TTC to receiving feedback, the underlying processes might not only be distributed  
181 across the cortex, but also across time within the trial. To characterize the potentially dynamic rela-



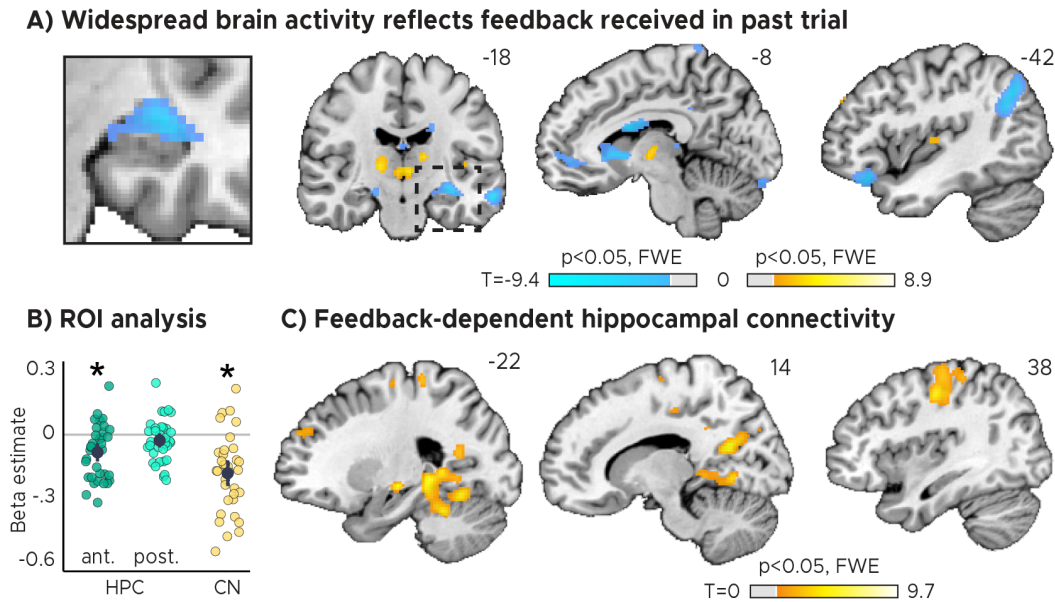

**Figure 3: Brain regions signalling TTC-task performance.** Activity in each trial was modeled parametrically as a function of the feedback received at the end of the trial. **A)** Voxel-wise analysis. We plot thresholded t-test results at 1 mm resolution overlaid on a structural template brain. MNI coordinates and insert zooming in on the hippocampus added. A large network of regions signalling TTC performance included the hippocampus, striatum and cerebellum. **B)** Independent regions-of-interest analysis for the anterior (ant. HPC) and posterior (post. HPC) hippocampus as well as the caudate nucleus (CN). We plot the beta estimate obtained for the parametric modulator modeling trial-wise activity as a function of task performance. Negative values indicate a negative relationship between feedback valence and brain activity. Depicted are the means and SEM across participants (black dot and line) overlaid on single participant data (coloured dots). Statistics reflect  $p < 0.05$  at Bonferroni-corrected levels (\*) obtained using a group-level two-tailed one-sample t-test against zero.

182 tionship between activity and TTC-task performance in detail, we repeated the voxel-wise analysis  
 183 for each trial phase separately (Fig. S3, similar to prior work (Wimmer et al., 2012)). We modelled  
 184 each phase with a distinct regressor in a new GLM, finding strong differences between the trial  
 185 phases in most of the observed areas. The hippocampus and caudate were again most strongly  
 186 modulated when participants received feedback (Fig. S3). While the results obtained for the three  
 187 phases are not independent due to the inherent temporal-order effects within each trial (Fig. 1A),  
 188 they nevertheless suggest that the relationship between activity in each area and the behavioral  
 189 outcome in the TTC-task is dynamic, and that the BOLD signal in different regions peaks at different  
 190 times. Moreover, the fact that the hippocampus and the caudate were most strongly modulated  
 191 in the feedback phase is again consistent with a role in rapid sensorimotor learning.

192 In sum, these results show that activity in various regions including the hippocampus and the cau-  
 193 date reflects the feedback received in the previous trial, but also the one received in the current  
 194 trial. Critically, this is the case even though the actual feedback that was received was independent  
 195 across trials (Fig. S1A;  $t(33) = 1.03, p = 0.312, d = 0.18, CI : [-0.17, 0.52]$ ), suggesting that these effects  
 196 rest at least partially on independent variance in the fMRI signal.

### 197 **Timing specificity and generalization in the hippocampus and in the striatum**

198 Two critical open questions remained. First, did the observed feedback modulation actually reflect  
 199 effective learning and thus behavioral improvements over trials? Second, was the information  
 200 that was learned specific to the interval that was tested in a given trial, thus likely serving TTC

201 specificity, or was independent of the tested interval, potentially serving TTC generalization? To  
 202 answer these questions in one analysis, we conducted a GLM analysis in which we modeled activity  
 203 not as a function of feedback received in the previous (Fig. 2) or current trial (Fig. 3), but as a  
 204 function of the difference in feedback between trials (Fig. 4). Specifically, we modeled with two  
 205 separate parametric regressors the improvements in TTC task performance across subsequent  
 206 trials (regressor 1: TTC-generalized learning) as well as the improvements over subsequent trials  
 207 in which the same TTC interval was tested (regressor 2: TTC-specific learning). We again accounted  
 208 for nuisance variance as before, and contrasted trials in which participants had improved versus  
 209 the ones in which they had not improved or got worse.

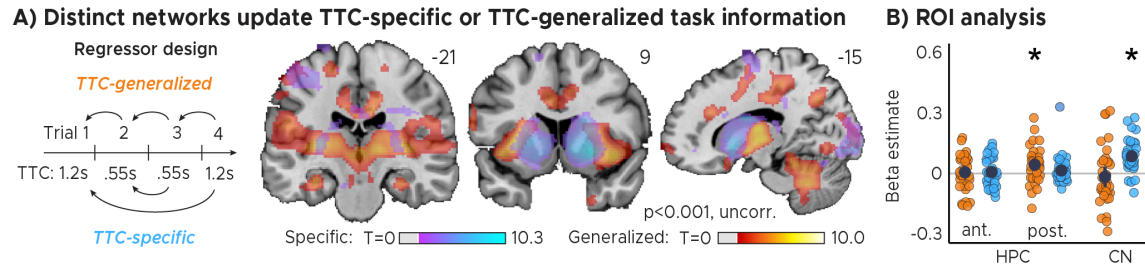

**Figure 4: Distinct cortical and subcortical networks signal learning of TTC-specific and TTC-generalized task information.** **A) Left panel:** Visual depiction of parametric modulator design. Two regressors per run modeled the improvement in behavioral performance since the last trial independent of the tested TTC (Regressor 1: TTC-generalized) or the improvement since the last trial when the same target TTC was tested (Regressor 2: TTC-specific). **Right panel:** Voxel-wise analysis results for TTC-specific and TTC-generalized regressors. We plot thresholded t-test results at 1mm resolution overlaid on a structural template brain. MNI coordinates added. Note that we depict the results at uncorrected levels for visualization, but the striatal and hippocampal effects survive  $p < 0.05$  whole-brain FWE-correction (Fig. S4A). **B) Independent regions-of-interest analysis for the anterior (ant. HPC) and posterior (post. HPC) hippocampus as well as the caudate nucleus (CN).** We plot the beta estimates obtained for TTC-generalized (orange dots) and TTC-specific (blue dots) regressors. Depicted are the mean and SEM across participants (black dot and line) overlaid on single participant data. Statistics reflect  $p < 0.05$  at Bonferroni-corrected levels (\*) obtained using a group-level one-tailed one-sample t-test against zero.

210 Strikingly, our voxel-wise analysis revealed both TTC-specific and TTC-generalized learning activity  
 211 throughout cortical and subcortical regions, with distinct areas engaging in either one or in both  
 212 of these processes (Fig. 4A). Most prominently, we observed a salient distinction in the striatum  
 213 (Fig. 4A), and we found that hippocampal activity signaled behavioral improvements independent  
 214 of the TTC intervals tested. An independent ROI analysis confirmed that this TTC-generalized main  
 215 effect was localized to the posterior section of the hippocampus (Fig. 4B; one-tailed one-sample  
 216  $t$  tests; TTC-specific: anterior HPC,  $t(33) = 0.57, p = 0.285, p_{fwe} = 1, d = 0.10, CI : [-0.24, 0.44]$ , pos-  
 217 terior HPC,  $t(33) = 1.29, p = 0.103, p_{fwe} = 0.619, d = 0.22, CI : [-0.12, 0.57]$ ; TTC-generalized: an-  
 218 terior HPC,  $t(33) = 0.36, p = 0.360, p_{fwe} = 1, d = 0.06, CI : [-0.28, 0.40]$ , posterior HPC,  $t(33) =$   
 219  $2.81, p = 0.004, p_{fwe} = 0.025, d = 0.48, CI : [0.12, 0.85]$ ). In stark contrast, the caudate signaled  
 220 improvements in behavioral performance only relative to previous trials in which the same TTC  
 221 interval was tested as in the current trial (Fig. 4B; one-tailed one-sample  $t$  tests; TTC-specific:  
 222  $t(33) = 5.95, p = 5.6 \times 10^{-7}, p_{fwe} = 3.4 \times 10^{-6}, d = 1.02, CI : [0.61, 1.45]$ ; TTC-generalized:  $t(33) =$   
 223  $-0.67, p = 0.746, p_{fwe} = 1, d = -0.11, CI : [-0.46, 0.23]$ ). It thus likely engaged in the updating of TTC-specific  
 224 information, unlike the hippocampus, with both regions nevertheless reflecting the behavioral im-  
 225 provements over time. Finally, we again estimated the functional connectivity profile of the hip-  
 226 pocampal main effect as before (sphere with 4mm radius centered on the peak voxel at  $x = -30,$   
 227  $y = -24, z = -18$ ), revealing behavioral-improvement-dependent co-fluctuations in multiple regions in-  
 228 cluding the putamen and the thalamus (Fig. S5).



229 These results suggest that the caudate may serve specificity by updating information specific to  
 230 the target TTC, whereas the hippocampus may serve generalization by updating information that  
 231 is independent of the target TTC. In this task, an efficient way of generalizing across TTCs is to  
 232 bias one's responses towards the mean of the TTC distribution, which effectively corresponds to  
 233 the regression effect that we observed on a behavioral level (Fig. 1B). Given the feedback mod-  
 234 ulation and learning effects we reported above, we thus hypothesized that hippocampal activity  
 235 should also reflect the magnitude of the regression effect in behavior. Likewise, caudate activity  
 236 should reflect how accurate participants were independent of the regression effect. To test this  
 237 in a final analysis, we modeled the activity in each trial parametrically either as a function of per-  
 238 formance (i.e. the difference between estimated and true TTC) or as a function of the strength of  
 239 the regression effect in each trial (i.e. the difference between the estimated TTC and the mean  
 240 of the tested intervals). Voxel-wise weights for these two regressors were estimated in two inde-  
 241 pendent GLMs in which nuisance variance was again accounted for as before. Both voxel-wise  
 242 and ROI-based analyses showed that that caudate activity indeed reflected how accurate partici-  
 243 pants were in each trial (Fig. 5A, B; two-tailed one-sample  $t$  test;  $t(33) = -5.62, p = 2.9 \times 10^{-6}, p_{fwe} =$   
 244  $8.7 \times 10^{-6}, d = -0.96, CI : [-1.39, -0.56]$ ), but not the regression effect (two-tailed one-sample  $t$  test;  
 245  $t(33) = 1.08, p = 0.287, p_{fwe} = 0.859, d = 0.19, CI : [-0.16, 0.53]$ ), along with other regions. Hip-  
 246 pocampal activity reflected the accuracy in each trial (two-tailed one-sample  $t$  tests; anterior HPC,  
 247  $t(33) = -4.85, p = 2.9 \times 10^{-5}, p_{fwe} = 8.7 \times 10^{-5}, d = -0.83, CI : [-1.24, -0.44]$ ; posterior HPC,  $t(33) =$   
 248  $-2.88, p = 0.007, p_{fwe} = 0.021, d = -0.49, CI : [-0.86, -0.14]$ ), consistent with the previously reported  
 249 feedback modulation (Fig. 3), but in addition it indeed reflected how strongly participants' TTC  
 250 estimates regressed towards their mean (Fig. 5A, B; two-tailed one-sample  $t$  tests; anterior HPC,  
 251  $t(33) = -5.55, p = 3.6 \times 10^{-6}, p_{fwe} = 1.1 \times 10^{-5}, d = -0.95, CI : [-1.37, -0.55]$ ; posterior HPC,  $t(33) =$   
 252  $-1.06, p = 0.295, p_{fwe} = 0.886, d = -0.18, CI : [-0.53, 0.16]$ ). Notably, similar effects were observed in  
 253 prefrontal and posterior cingulate areas (Fig. 5A).

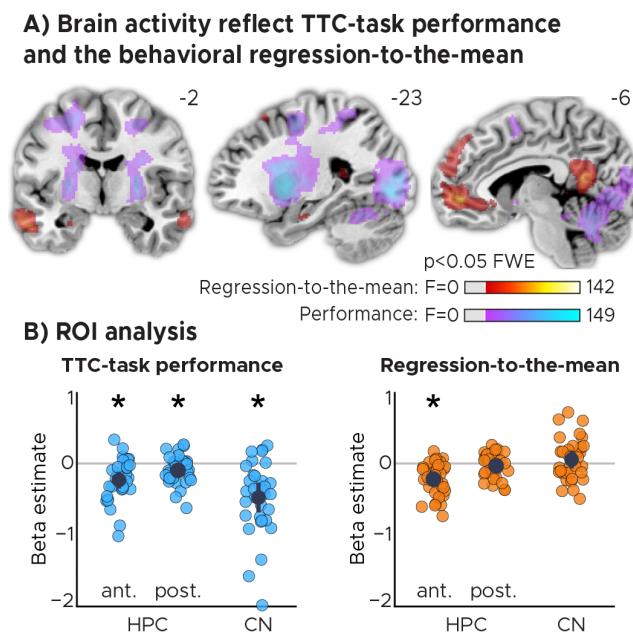

**Figure 5: TTC-task performance vs. behavioral regression effect.** A) Voxel-wise analysis. We plot thresholded F-test results for the task-performance regressor and the regression-to-the-mean regressor at 1 mm resolution overlaid on a structural template brain. MNI coordinates added. Distinct networks reflect task performance and the regression effect. B) Independent regions-of-interest analysis for the anterior (ant. HPC) and posterior (post. HPC) hippocampus as well as the caudate nucleus (CN). We plot the beta estimates obtained for each participant for each of the two regressors. Depicted are the mean and SEM across participants (black dot and line) overlaid on single participant data (blue and orange dots). Statistics reflect  $p < 0.05$  at Bonferroni-corrected levels (\*) obtained using a group-level two-tailed one-sample  $t$ -test against zero.

## 254 Eye tracking: no biases in viewing behavior across comparisons

255 To ensure that our results could not be attributed to systematic error patterns in viewing behavior,  
256 we analyzed the co-recorded eye tracking data of our participants in detail. After preprocessing  
257 (see methods), we used Kruskal-Wallis tests to test for differences in fixation accuracy across speed  
258 levels (Fig. S6A;  $\chi(2) = 0.61, p = 0.895, \epsilon^2 = 0.005, CI : [0.00, 0.06]$ ) and received-feedback levels (Fig.  
259 S6B;  $\chi(2) = 0.190, p = 0.909, \epsilon^2 = 0.002, CI : [0.00, 0.10]$ ). Moreover, we examined the relationship  
260 of the fixation error with TTC-task performance (Fig. S6C; Spearman's  $\rho = 0.17, p = 0.344$ ) as  
261 well as with the behavioral regression effect (Fig. 1B, Fig. S6C; Spearman's  $\rho = 0.26, p = 0.131$ ).  
262 None of these control analyses suggested that biased patterns in viewing behavior could hinder  
263 the interpretation of our results.

## 264 Discussion

265 This study investigated how the brain extracts the statistical regularities of a sensorimotor timing  
266 task in the service of immediate actions and how the formed sensorimotor representations are  
267 continuously updated in a feedback-dependent manner. We focused on how the hippocampus  
268 and the caudate support behavioral flexibility, specificity and generalization due to their known  
269 coding schemes for space, time and reward. We monitored human brain activity with fMRI while  
270 participants performed a time-to-contact (TTC) estimation task, allowing us to analyze brain activity  
271 as a function of behavioral feedback and task performance as well as of the improvements in task  
272 performance over time using a series of general linear models. We found that the feedback partic-  
273 ipants received was reflected in the activity of a large network of brain regions, which prominently  
274 included the hippocampus and the striatum. Moreover, feedback also modulated hippocampal  
275 functional connectivity with other task-relevant regions in the subsequent trial. By showing that  
276 striatal and hippocampal activity directly followed the improvements in behavioral performance  
277 over time, we demonstrated a link between brain activity and effective learning. Strikingly, the  
278 two structures engaged in the learning of different types of information in parallel: caudate activ-  
279 ity reflected behavioral improvements specific to the tested time intervals, whereas hippocampus  
280 generalized across time intervals. These results provide empirical evidence for distinct but com-  
281plementary roles of the hippocampus and the striatum in sensorimotor learning, supporting speci-  
282ficity and generalization, and they show that the underlying processes directly translate into the  
283 immediate behavior participants express. In what follows, we discuss our results in the context  
284 of prior work on timing behavior and on spatiotemporal coding in the hippocampus and striatum.  
285 Moreover, we elaborate on the domain-general nature of hippocampal-striatal interactions and of  
286 the flexible learning mechanisms that potentially underlie the effects observed in this study.

## 287 Spatiotemporal coding in the hippocampus and striatum

288 Both the striatum and the hippocampus encompass neurons sensitive to the time that has passed  
289 since a certain task has begun (Paton & Buonomano, 2018; Eichenbaum, 2014; Umbach et al., 2020).  
290 These cells might play an important role in guiding timing behavior (Nobre & van Ede, 2018), which  
291 potentially explains why damage or inactivation of either structure in rodents (Meck et al., 1984;  
292 Gouvêa et al., 2015), non-human primates (Wang et al., 2018) or humans (Richards, 1973) impairs  
293 the ability to estimate durations. Our results are in line with these reports, showing that fMRI activ-  
294 ity in the hippocampus and striatum also reflects participants' TTC estimation ability (Fig. 3). They  
295 are also in line with other human neuroimaging studies suggesting that the hippocampus bridges  
296 temporal gaps between two stimuli during trace eyeblink conditioning (Cheng et al., 2008), and that

297 it represents duration within event sequences (Barnett et al., 2014; Thavabalasingam et al., 2018,  
298 2019). Our results support prior work showing that striatal activity prominently encodes temporal  
299 information (Bakhurin et al., 2017; Mello et al., 2015), reflects interval learning (Dallérac et al., 2017)  
300 and predicts duration judgements in rats (Mello et al., 2015; Gouvêa et al., 2015), non-human pri-  
301 mates (Wang et al., 2018) and humans (Hinton & Meck, 2004). Such striatal representations of time  
302 were shown to control the timing of actions in concert with neurons in the medial frontal cortex in  
303 monkeys (Wang et al., 2018).

304 Our results speak to the above-mentioned reports by revealing the widespread brain activity con-  
305 tributing to effective sensorimotor learning of intervals in humans (Fig. 2,3,4,S3,S4,S5). Moreover,  
306 they demonstrate a direct link between hippocampal and striatal activity, the feedback participants  
307 received and the behavioral improvements expressed over time (Fig. 4). Critically, this underlying  
308 learning process must occur in real-time when feedback is presented, suggesting that it plays out  
309 on short-term time scales. Notably, the hippocampus is neither typically linked to sensorimotor  
310 timing tasks such as ours, nor is it considered to reflect temporal relationships on such short time  
311 scales in humans. Instead, human hippocampal activity is often studied in the context of much  
312 longer time scales, which showed that it may encode the succession of experiences and events  
313 into long-term episodic memories (Deuker et al., 2016; Montchal et al., 2019) or contribute to the  
314 establishment of chronological relations between events in memory (Gauthier et al., 2019, 2020).  
315 Intriguingly, however, the mechanisms at play may build on similar temporal coding principles as  
316 those discussed for motor timing (Yin & Troger, 2011; Eichenbaum, 2014; Howard, 2017; Palombo  
317 & Verfaellie, 2017; Nobre & van Ede, 2018; Paton & Buonomano, 2018; J. L. Bellmund et al., 2020;  
318 J. L. S. Bellmund et al., 2021; Shikano et al., 2021; Shimbo et al., 2021).

319 Importantly, our task can be solved by estimating temporal intervals directly, but also by extrap-  
320 olating the movement of the fixation target over time, shifting the locus of attention towards the  
321 target boundary (Fig. 1). The brain may thus likely monitor and learn about the temporal and  
322 spatial task regularities in parallel. Participants' TTC estimates were further informed exclusively  
323 by the speed of the target, which inherently builds on tracking kinematic information over time,  
324 which may explain why TTC tasks also engage visual motion regions in humans (de Azevedo Neto  
325 & Amaro Júnior, 2018). While future studies could tease apart spatial and temporal factors explic-  
326 itly, our results are in line with both accounts. The hippocampus and surrounding structures for  
327 example represent maps of visual space in primates (Nau et al., 2018), which potentially mediate a  
328 coordinate system for behavioral planning, for integrating visual information with existing knowl-  
329 edge and to compute vectors in space. These visuospatial representations are perfectly suited to  
330 guide attention and thus also the relevant behaviors in our task (Aly & Turk-Browne, 2017), which  
331 could be tested in the future akin to prior work using a similar paradigm (Nau et al., 2018a).

### 332 **The role of feedback in timed motor action**

333 Critically, our results do not imply that the hippocampus acts as an "internal clock" in our task,  
334 nor do we think of it as representing action sequences or coordinating motor commands directly.  
335 Rather, its activity may indicate the feedback-dependent updating of encoded information gener-  
336 ally independent of the specific intervals or even the task that were used. The hippocampus has  
337 been proposed as a domain-general model-based learning system, which encodes the task struc-  
338 ture into an (allocentric) cognitive-map-like format (Kumaran, 2012; Schlichting & Preston, 2015;  
339 Chersi & Burgess, 2015; Schapiro et al., 2017; Wikenheiser et al., 2017; Behrens et al., 2018; Vikbladh  
340 et al., 2019; Geerts et al., 2020; Momennejad, 2020). Consequently, it may help to encode the  
341 structure of a task abstracted away from our immediate experience. In contrast, the striatum was

342 proposed to encode sensory states or actions, thus supporting the encoding of task-specific (ego-  
343 centric) information (Chersi & Burgess, 2015; Geerts et al., 2020). Together, the two regions may  
344 thus together play an important role in decision making beyond timing.

345 Consistent with these ideas, we observed that striatal and hippocampal activity was modulated by  
346 feedback in a behavior-dependent manner (Fig. 2,3). Similar feedback signals have previously been  
347 linked to learning (Schönberg et al., 2007; Cohen & Ranganath, 2007; Shohamy & Wagner, 2008;  
348 Foerde & Shohamy, 2011; Wimmer et al., 2012) and to the successful formation of hippocampus-  
349 dependent long-term memories in humans (Wittmann et al., 2005). Moreover, hippocampal activity  
350 is known to signal learning in other tasks (Foerde & Shohamy, 2011; Dickerson & Delgado, 2015;  
351 Wirth et al., 2009; Schapiro et al., 2017; Kragel et al., 2021). Our results are also in line with prior  
352 work on the putative role of the caudate in updating temporal priors in non-human primates (Wang  
353 et al., 2018; Suzuki & Tanaka, 2019) and with reports showing that disrupting striatal activity leads  
354 to decreases in timing-task performance specifically when the tested time intervals change (Mello  
355 et al., 2015; Wang et al., 2018). Here, we show a direct relationship between such effective-learning  
356 signals and timing behavior, and we show that feedback modulates widespread brain activity (Fig.  
357 2, 3, potentially reflecting the involvement of these areas in the coordination of reward behavior  
358 observed earlier (LeGates et al., 2018). These regions includes those serving sensory and motor  
359 functions, but also those encoding the structure of a task or the necessary value functions associ-  
360 ated with specific actions (Lee et al., 2012).

361 The present study further demonstrates that activity in the hippocampus co-fluctuates with activ-  
362 ity in the striatum in a task-dependent manner. Similar co-fluctuations with hippocampal activity  
363 were observed in the motor cortex, typically involved in action planning and execution, the parahip-  
364 pocampus and medial parietal lobe, often associated with visual-scene analysis (Epstein & Baker,  
365 2019), as well as the cerebellum (Fig. 2C), which is tightly coupled with the basal ganglia for coordi-  
366 nating actions (Bostan & Strick, 2018). This may indicate that behavioral feedback also affects the  
367 functional connectivity profile of the hippocampus with those domain-selective regions that are  
368 currently engaged in the ongoing task.

369 What might be the neural mechanism underlying sensorimotor learning in our study? Prior work  
370 has shown that frontal, striatal and hippocampal temporal receptive fields scale relative to the  
371 tested intervals, and that they re-scale dynamically when those tested intervals change (MacDon-  
372 ald et al., 2011; Gouvêa et al., 2015; Mello et al., 2015; Wang et al., 2018). This may enable the en-  
373 coding and continuous maintenance of optimal task priors, which keep our actions well-adjusted  
374 to our current needs. We speculate that such receptive-field re-scaling also underlies the learning  
375 discussed here, which likely builds both on local and network-wide re-weighting of functional con-  
376 nections between neurons and entire regions. Consistent with this idea and the present results,  
377 receptive-field re-scaling can occur on a trial-by-trial basis in the striatum (Mello et al., 2015; Gouvêa  
378 et al., 2015; Wang et al., 2018) and in the hippocampus (Shikano et al., 2021; Shimbo et al., 2021).

### 379 **Striatal and hippocampal interactions: A trade-off between specificity and generalization?**

380 So far, we discussed how hippocampal and striatal processes may support the flexible expression  
381 of timing behavior, but how does this process strike the balance between specificity and gener-  
382 alization (i.e. how does the learned probability distribution capture the tested intervals optimally  
383 without overfitting)? Our results suggest that the trade-off between these two objectives is gov-  
384 erned by activity in many regions, which update different types of task information in parallel (Fig.  
385 4A). Hippocampal activity reflected improvements in behavioral performance over trials indepen-

386 dent of the tested TTC level, whereas the caudate signaled behavioral improvements specifically  
387 over those trials in which the same TTC was tested. This suggests a striking functional distinction  
388 between these areas, serving either specificity or generalization, which is complemented by other  
389 areas engaging in both processes simultaneously such as the putamen, the pallidum and the tha-  
390 lamus (Fig.S4C).

391 Interestingly, this putative division of labor between the hippocampus and striatal areas dovetails  
392 with a large body of literature on spatial navigation, reporting many similarities but also clear differ-  
393 ences in function between these structures (Doeller et al., 2008; Chersi & Burgess, 2015; Goodroe  
394 et al., 2018; Gahnstrom & Spiers, 2020; Geerts et al., 2020). Prior work has shown that the striatum  
395 supports the reinforcement-dependent encoding of locations relative to landmarks, whereas the  
396 hippocampus may help to encode the structure of the environment in a generalizable and map-like  
397 format. We propose that this encoding of specific and generalizable information is the fundamental  
398 and domain-general function of hippocampal-striatal interactions: they find an optimal trade-off  
399 between specificity and generalization. This agrees well with the functional differences observed  
400 in the present study, with caudate activity potentially reflecting the encoding of individual details  
401 of our task such as the TTC intervals, and the hippocampus generalizing across TTCs to encode the  
402 overall task structure. Notably, meeting the two objectives can have antagonistic effects on behav-  
403 ior, and the consequences of the updating sensorimotor representations must likely be commu-  
404 nicated to a wider network of task relevant regions. This could explain the activity co-fluctuations  
405 we observed in our data (Fig. 2C), which fits to prior observations of the two areas interacting in  
406 many tasks including associative learning (Mattfeld & Stark, 2015) and navigation (Brown & Stern,  
407 2014), even showing synchronized neural activity in rats (Berke et al., 2004), and when temporal  
408 expectations are violated (van de Ven et al., 2020).

409 Importantly, we observed that TTC estimates regress towards the mean of the sampled intervals,  
410 an effect that is well known in the timing literature (Fig. 1B), (Jazayeri & Shadlen (2010)) and in  
411 other domains (Petzschner et al., 2015). We hypothesized that this effect is grounded in the activity  
412 of the hippocampus for the following reasons. First, biasing time estimates towards their mean  
413 may naturally serve generalization, because the mean of the tested intervals will likely also be the  
414 mean of possible future intervals. Second, the hippocampus has been suggested to play a cen-  
415 tral role in generalization in other non-temporal domains (Kumaran, 2012; Schlichting & Preston,  
416 2015; Schapiro et al., 2017; Momennejad, 2020). The picture that emerges from our results is that  
417 this function of the hippocampus may also support generalization in the temporal domain, poten-  
418 tially reflecting the temporal-context-dependent learning of the grand mean of the tested intervals  
419 (Jazayeri & Shadlen, 2010). This is because the hippocampus signalled TTC-generalized behavioral  
420 improvements over trials (Fig. 4) as well as the strength of the TTC regression effect in behavior (Fig.  
421 5). We thus provide evidence for the poorly understood neural underpinnings of the well-known  
422 regression effect in behavior (Petzschner et al., 2015), which likely reflects an important behavioral  
423 adaptation central to our ability to generalize. Our findings directly predict that participants with  
424 stronger hippocampal involvement during encoding will perform better when new intervals are  
425 tested compared to controls, a prediction that could be tested in future work.

426 Conversely, we found that the caudate signalled behavioral improvements that were specific to the  
427 TTC that was tested (Fig. 4), and it reflected the accuracy of the TTC estimates independent of the  
428 regression effect (Fig. 5). Moreover, the putamen was strongly modulated by both accuracy and  
429 the regression effect unlike the caudate (Fig. 4), revealing a striking functional distinction across  
430 striatal subregions. These findings are in line with a large body of literature implicating the striatum  
431 in coding time and reward (Cox & Witten, 2019; Petter et al., 2018; Paton & Buonomano, 2018) as



432 well as the value of specific actions (Samejima et al., 2005) in a distributed manner. Prior studies  
433 have for example shown a functional distinction between sub-units of the striatum (e.g. Hunnicutt  
434 et al. (2016); Grahn et al. (2008)), which also agrees with the fact that stable task-structure and  
435 flexible events are coded in parallel in the striatum (Kubota et al., 2009). They also agree with  
436 reports showing that the spatiotemporal integration principles governing memory formation in  
437 the striatum and the hippocampus differ (Ferbinteanu, 2020).

438 Finally, feedback-dependent hippocampal-striatal interactions may also speak to the behavioral  
439 impairments observed in patients with Parkinson's disease (PD), who often misestimate durations  
440 when neurons in the striatum lack dopaminergic inputs. The timing judgements of such patients  
441 tend to regress toward the mean more quickly without dopaminergic medication than when these  
442 patients are medicated (Malapani et al., 1998, 2002). We propose that this may reflect an im-  
443 pairment in the interval-specific striatal learning mechanism we observed here (Shi et al., 2013).  
444 This is also in agreement with findings of impaired learning in PD patients, which has previously  
445 been linked to hippocampal and striatal learning signals (Foerde & Shohamy, 2011; Wimmer et al.,  
446 2012). Fittingly, such timing impairments are most pronounced specifically when the tested inter-  
447 vals change, and they can be alleviated using dopamine medication, again pointing to a tight link  
448 between the effects observed here and reward processing. Notably, a similar dopaminergic control  
449 has been shown for hippocampal-dependent stimulus generalization (Kahnt & Tobler, 2016).

## 450 **Conclusion**

451 In sum, we combined fMRI and a time-to-contact estimation task to show that the human hippocam-  
452 pus and striatum support the effective learning from feedback, likely serving behavioral flexibility,  
453 specificity and generalization broadly. Hippocampal and striatal activity directly reflected the be-  
454 havioral improvements over trials, signalling the encoding of TTC-generalized and TTC-specific in-  
455 formation respectively. This strikingly resembled previous observations made in the spatial do-  
456 main, suggesting that the proposed functions of hippocampal-striatal interactions are domain-  
457 general. Inspired by two parallel lines of research, one centered on sensorimotor timing and the  
458 other one on cognitive mapping and structure learning, we suggest that the fundamental function  
459 of hippocampal-striatal interactions may be finding the trade-off between specificity and gener-  
460 alization. Our results demonstrate that the hippocampus and striatum play an important role in  
461 feedback learning, and they implicate both structures in guiding flexible, specific and generalizable  
462 timing behavior in humans.

## 463 **Acknowledgements**

464 We thank Raymundo Machado de Azevedo Neto for helpful comments on an earlier version of  
465 this manuscript. CFD's research is supported by the Max Planck Society, the Kavli Foundation, the  
466 European Research Council (ERC-CoG GEOCOG 724836), the Centre of Excellence scheme of the  
467 Research Council of Norway – Centre for Neural Computation (223262/F50), The Egil and Pauline  
468 Braathen and Fred Kavli Centre for Cortical Microcircuits and the National Infrastructure scheme  
469 of the Research Council of Norway – NORBRAIN (197467/F50).

## 470 **Author Contributions**

471 MN, IP and CFD developed the research questions. MN conceived the experimental idea. IP and MN  
472 designed the experimental paradigm, visualized the results and embedded them in the literature  
473 with help from RK, VW and CFD. IP implemented the experimental code and acquired and analyzed

474 the data with close supervision and help from MN. MN wrote the manuscript with help from IP. CFD  
475 secured funding. RK, VW and CFD provided critical feedback and all authors discussed the results  
476 and edited the final manuscript.

#### 477 **Declaration of interest**

478 The authors declare no conflicts of interest.

#### 479 **Data and code availability**

480 Source data and analysis scripts will be shared upon publication. Raw data are available from the  
481 authors upon request.

## 482 **Methods**

### 483 **Participants**

484 We recruited 39 participants for this study (16 females, 19-35 years old). Five participants were  
485 excluded: one participant did not comply with the task instructions; one was excluded due to a fail-  
486 ure of the eye-tracker calibration; three participants were excluded due to technical issues during  
487 scanning. A total of 34 participants entered the analysis. The study was approved by the regional  
488 committee for medical and health research ethics (project number 2017/969) in Norway and partic-  
489 ipants gave written consent prior to scanning in accordance with the declaration of Helsinki (2008).

### 490 **Task**

491 Participants performed two tasks simultaneously: a smooth pursuit visual-tracking task and a time-  
492 to-contact estimation task. The visual tracking task entailed fixation at a fixation disc that moved on  
493 predefined linear trajectories with one of four speeds: 4.2°/s, 5.8°/s, 7.5°/s and 9.1°/s. Upon reach-  
494 ing the end of such a linear trajectory, the dot stopped moving until the second task was completed.  
495 This second task was a time-to-collision (TTC) estimation task in which participants indicated when  
496 the fixation target would have hit a circular boundary if it had continued moving. This boundary  
497 was a yellow circular line surrounding the target trajectory with 10° radius. Participants gave their  
498 response by pressing a button at the anticipated moment of collision. They performed this task  
499 while still keeping fixation, and the individual linear trajectories were all of the same length (10°  
500 visual angle), leading to four target TTC durations of 1.2s, 0.88s, 0.67s and 0.55s tested in a counter-  
501 balanced fashion across trials. After the button press, participants received feedback for 1 second  
502 informing them about the accuracy of their response. When participants *overestimated* the TTC,  
503 half of the fixation disc closest to the boundary changed color (orange or red) as a function of re-  
504 sponse accuracy (medium or low, respectively). When participants *underestimated* the TTC, half of  
505 the fixation disc further away from the boundary changed color. When participants were accurate,  
506 two opposing quadrants of the fixation disc would turn green. This allowed us to present feedback  
507 at fixation while keeping the number of informative pixels matched across feedback levels. To cal-  
508 ibrate performance feedback across different TTC durations, the precise response window widths  
509 of each feedback level scaled with the speed of the fixation target. The following formula was used  
510 to scale the response window width:  $d \pm ((k * d)/2)$  where  $d$  is the target TTC and  $k$  is a constant  
511 proportional to 0.3 and 0.15 for high and medium accuracy, respectively. This ensured that partici-  
512 pants received approximately the same feedback for tested TTCs despite the known differences in  
513 absolute performance between target TTCs due to inherent scalar variability (Gibbon, 1977). When  
514 no response was given, participants received low-accuracy feedback (two opposing quadrants of  
515 the fixation dot turned red) after a 4 seconds timeout. After the feedback, the disc remained in its  
516 last position for a variable inter-trial interval (ITI) sampled randomly from a uniform distribution  
517 between 0.5 seconds and 1.5 seconds. Following the end of the ITI, the dot continued moving in a  
518 different direction. In the course of 768 trials, each target TTC was sampled 192 times. We sampled  
519 eye-movement directions with 15° resolution, leading to an overall trajectory that was star-shaped,  
520 similar to earlier reports (Nau et al., 2018a). The full trajectory was never explicitly shown to the  
521 participants.

### 522 **Behavioral analysis**

523 Participants indicated the estimated TTC in each trial via button press. Estimated and true TTC were  
524 strongly correlated (Spearman's  $\rho = 0.91, p = 2.2 \times 10^{-16}$ ) showing that participants performed the

525 task well. However, in line with previous work (Jazayeri & Shadlen, 2010), participants tended to  
526 overestimate shorter durations and underestimate longer durations (Fig. 1B). As a measure of  
527 behavioral performance, we computed the absolute TTC-error defined as the absolute difference  
528 in estimated and true TTC for each target-TTC level. Participants received feedback after each trial  
529 corresponding to the absolute TTC error of that trial. On average, 46.9% ( $\sigma = 9.1$ ) of trials were of  
530 *high accuracy*, 31.2% ( $\sigma = 3.9$ ) were of *medium accuracy* and 21.1% ( $\sigma = 9.8$ ) were of *low accuracy*  
531 (Fig. 1C). Moreover, we found that this feedback distribution was indeed similar across target-TTC  
532 levels as planned (Fig. S1B). To test participants' performance improvements over time, we used a  
533 linear mixed-effects model with run as predictor, absolute TTC-error as the dependent variable and  
534 participants as the error term. The results showed a main effect of run ( $F(3) = 3.2944, p = 0.024, \epsilon^2 =$   
535  $0.06, CI : [0.00, 0.13]$ ). Post-hoc tests using Bonferroni correction confirmed a significant decrease in  
536 absolute TTC-error between run 1 and 4 ( $t(104) = 2.86, p_{fwe} = 0.031, d = 0.56, CI : [0.17, 0.95]$ ).

### 537 **Imaging data acquisition & preprocessing**

538 Imaging data were acquired on a Siemens 3T MAGNETOM Skyra located at the St. Olavs Hospi-  
539 tal in Trondheim, Norway. A T1-weighted structural scan was acquired with 1mm isotropic voxel  
540 size. Following EPI-parameters were used: voxel size=2mm isotropic, TR=1020ms, TE=34.6ms, flip  
541 angle=55°, multiband factor=6. Participants performed a total of four scanning runs of 16-18 min-  
542 utes each including a short break in the middle of each run. Functional images were corrected for  
543 head motion and co-registered to each individual's structural scan using SPM12 ([www.fil.ion.ucl](http://www.fil.ion.ucl.ac.uk/spm/)  
544 [.ac.uk/spm/](http://www.fil.ion.ucl.ac.uk/spm/)). We used the FSL topup function to correct field distortions based on one image ac-  
545 quired with inverted phase-encoding direction (<https://fsl.fmrib.ox.ac.uk/fsl/fslwiki/topup>).  
546 Functional images were then spatially normalized to the Montreal Neurological Institute (MNI)  
547 brain template and smoothed with a Gaussian kernel with full-width-at-half-maximum of 4 mm  
548 for regions-of-interest analysis or with 8 mm for whole-brain analysis. Time series were high-pass  
549 filtered with a 128 s cut-off period. The results of all voxel-wise analyses were overlaid on a struc-  
550 tural T1-template (colin27) of SPM12 for visualization.

### 551 **Regions of interest definition and analysis**

552 Regions-of-interest masks for different brain areas were generated for each individual participant  
553 based on the automatic parcellation derived from FreeSurfer's structural reconstruction ([https://](https://surfer.nmr.mgh.harvard.edu/)  
554 [surfer.nmr.mgh.harvard.edu/](https://surfer.nmr.mgh.harvard.edu/)). The ROIs used in the present study include the caudate nucleus  
555 (CN) and the hippocampus (HPC) as main areas of interest (Fig. S2A) as well as the Nucleus Accum-  
556 bens, Thalamus, Putamen, Amygdala and Globus Pallidum in addition (Fig. S4). The hippocampal  
557 ROI was manually segmented following previous reports into its anterior and posterior sections  
558 based on the location of the uncal apex in the coronal plane as a bisection point (Poppenk et al.,  
559 2013). We did this because prior work suggested functional differences between anterior and pos-  
560 terior hippocampus with respect to their contributions to memory-guided behavior (Poppenk et  
561 al., 2013). All individual ROIs were then spatially normalized to the MNI brain template space and  
562 re-sliced to the functional imaging resolution using SPM12. All ROI analyses were conducted using  
563 4mm spatial smoothing.

564 All ROI analyses described in the following were conducted using the following procedure. We  
565 extracted beta estimates estimated for the respective regressors of interest for all voxels within  
566 a region in both hemispheres, averaged them across voxels within that region and hemispheres  
567 and performed one-sample t-tests on group level against zero as implemented in the software R  
568 (<https://www.R-project.org/>).

## 569 Brain activity as a function of current-trial performance

570 We used a mass-univariate general linear model to analyze the time courses of all voxels in the brain  
571 as a function of feedback received at the end of each trial. The model included one mean-centered  
572 parametric modulator per run with three levels reflecting the feedback received in each trial. The  
573 feedback itself was a function of TTC error in each trial (high accuracy = 0, medium accuracy = 0.5  
574 and low accuracy = 1). In addition, we added three nuisance regressors per run modeling ITIs,  
575 button presses, and periods of rest. These regressors were convolved with the canonical hemody-  
576 namic response function of SPM12. Moreover, the model included the six realignment parameters  
577 obtained during pre-processing as well as a constant term modeling the mean of the time series.  
578 We estimated weights for all regressors and conducted a t-test against zero using SPM12 for our  
579 feedback regressors of interest on the group level. Importantly, positive t-scores indicate a posi-  
580 tive relationship between fMRI activity and TTC error and hence with poor behavioral performance.  
581 Conversely, negative t-scores indicate a negative relation between the two variables and hence bet-  
582 ter behavioral performance.

583 In addition to the voxel-wise whole-brain analyses described above, we conducted independent  
584 ROI analyses for the anterior and posterior sections of the hippocampus (Fig. S2A, Fig. 3B; two-  
585 tailed one-sample  $t$  tests: anterior HPC,  $t(33) = -5.92, p = 1.2 \times 10^{-6}, p_{fwe} = 3.7 \times 10^{-6}, d = -1.02, CI : [-1.45, -0.60]$ ;  
586 posterior HPC,  $t(33) = -4.07, p = 2.7 \times 10^{-4}, p_{fwe} = 8.2 \times 10^{-4}, d = -0.70, CI : [-1.09, -0.32]$ )  
587 and for the caudate (Fig. S2B, Fig. 3B; two-tailed one-sample  $t$  test:  $t(33) = -7.56, p = 1.1 \times 10^{-8}, p_{fwe} =$   
588  $3.2 \times 10^{-8}, d = -1.30, CI : [-1.78, -0.85]$ ). Here, we tested the beta estimates obtained in our first-  
589 level analysis for the feedback regressor of interest. See section "Regions of interest definition and  
590 analysis" for more details.

## 591 Brain activity as a function of trial phase

592 To examine the relation between brain activity and behavioral performance in a trial in more detail,  
593 we repeated the univariate analysis explained above for each phase of the trial. Three regressors  
594 modelled the main effects of trial phase. Three additional parametric regressors modeled the feed-  
595 back effect on the activity during the tracking phase, the TTC estimation phase and the feedback  
596 phase in one GLM. In addition, we again added regressors modeling the ITI's, button presses and  
597 periods of rest to the model as well as head-motion regressors and a constant term as before. Each  
598 run was modeled separately. On the group-level, we again used SPM12 to perform t-tests against  
599 zero using the weights estimated for the feedback regressors of interest for each trial phase.

## 600 Brain activity as a function of performance on the previous trial

601 To examine how feedback modulates activity in the subsequent trial, we used a GLM analysis to  
602 model the activity of each voxel and trial as a function of feedback received in the previous trial. The  
603 GLM included three regressors modeling the feedback levels, one for ITIs, one for button presses  
604 and one for periods of rest, which were all convolved with the canonical hemodynamic response  
605 function of SPM12. In addition, the realignment parameters and a constant term were again added.  
606 On the group level, we then contrasted the weights obtained for the low error vs. high error re-  
607 gressors and tested for differences using t-tests implemented in SPM12.

608 Additionally, we again conducted ROI analyses for the anterior and posterior sections of the hip-  
609 pocampus (Fig. S2A, Fig. 2B; Two-tailed  $t$  tests: anterior HPC,  $t(33) = -3.80, p = 5.9 \times 10^{-4}, p_{fwe} =$   
610  $0.002, d = -0.65, CI : [-1.03, -0.28]$ ; posterior HPC,  $t(33) = -1.60, p = 0.119, p_{fwe} = 0.357, d = -0.27, CI :$   
611  $[-0.62, 0.07]$ ) as well as for the caudate (Fig. S2B, Fig. 2B; Two-tailed  $t$  test:  $t(33) = -5.85, p =$



612  $1.5 \times 10^{-6}$ ,  $p_{fwe} = 4.5 \times 10^{-6}$ ,  $d = -1.00$ ,  $CI : [-1.43, -0.59]$ ) following the same procedure as described ear-  
613 lier (section "Regions of interest definition and analysis"). Here, we tested beta estimates obtained  
614 in the first-level analysis for the feedback-in-previous-trial regressor of interest.

### 615 **Hippocampal functional connectivity as a function of previous-trial performance**

616 We conducted a psychophysiological interactions (PPI) analysis to examine whether hippocampal  
617 functional connectivity with the rest of the brain depended on the participant's performance on  
618 the previous trial. To do so, we centered a sphere onto the group-level peak effects within the HPC  
619 using main-effect GLM described in the previous section. The sphere was 4mm in radius and was  
620 centered on following MNI coordinates:  $x=-32$ ,  $y=-14$ ,  $z=-14$ . The GLM included a PPI regressor, a  
621 nuisance regressor accounting for the main effect of past-trial performance, and a nuisance regres-  
622 sor explaining variance due to inherent physiological signal correlations between the HPC and the  
623 rest of the brain. The PPI regressor was an interaction term containing the element-by-element  
624 product of the task time course (effects due to past-trial performance) and the HPC spherical seed  
625 ROI time course. The estimated beta weight corresponding to the interaction term was then tested  
626 against zero on the group-level using a t-test implemented in SPM12. This revealed brain areas  
627 whose activity was co-varying with the hippocampus seed ROI as a function of past-trial perfor-  
628 mance ( $n-1$ ).

629 Furthermore, we conducted an ROI analysis for the caudate (Fig. S2B; one-tailed t test:  $t(33) =$   
630  $-5.85$ ,  $p = 4.7 \times 10^{-4}$ ,  $d = 0.67$ ,  $CI : [0.29, 1.05]$ ) following the same procedure as described earlier (see  
631 section "Regions of interest definition and analysis"). Here, we tested the beta estimates obtained  
632 in the first-level analysis for the PPI regressor of interest against zero.

### 633 **Brain activity as a function of improvements in behavioral performance across trials**

634 We used a GLM to analyze activity changes associated with behavioral improvements across trials.  
635 One regressor modelled the main effect of the trial and two parametric regressors modeled the  
636 following contrasts: trials in which behavioral performance improved vs. trials in which behavioral  
637 performance did not improve or got worse relative to the previous trial. These regressors modeled  
638 the behavioral improvements either relative to the previous trial, and thus independently of TTC  
639 (likely serving generalization), or relative to the previous trial in which the same target TTC was pre-  
640 sented (likely serving specificity). These two regressors reflect the tests for target-TTC-generalized  
641 and target-TTC-specific learning, respectively. Improvement in performance was defined as re-  
642 ceiving feedback of higher valence than in the corresponding previous trial. The same nuisance  
643 regressors were added as in the other GLMs and all regressors except the realignment parame-  
644 ters and the constant term were convolved with the canonical hemodynamic response function of  
645 SPM12. On the group level, we tested the two parametric regressors of interest against zero using  
646 a t-test implemented in SPM12, effectively contrasting trials in which behavioral performance im-  
647 proved against trials in which behavioral performance did not improve or got worse relative to the  
648 respective previous trials. All runs were modeled separately.

649 Moreover, we again conducted ROI analyses for the anterior and posterior sections of the hip-  
650 pocampus (Fig. S2A) as well as for the caudate (Fig. S2B) following the same procedure as described  
651 earlier (see section "Regions of interest definition and analysis"). Here, we tested beta estimates  
652 obtained in the first-level analysis for the TTC-specific and TTC-generalized learning regressors us-  
653 ing one-tailed one-sample t-tests (TTC-specific: anterior HPC,  $t(33) = 0.57$ ,  $p = 0.285$ ,  $p_{fwe} = 1$ ,  $d =$   
654  $0.10$ ,  $CI : [-0.24, 0.44]$ , posterior HPC,  $t(33) = 1.29$ ,  $p = 0.103$ ,  $p_{fwe} = 0.619$ ,  $d = 0.22$ ,  $CI : [-0.12, 0.57]$ , cau-  
655 date,  $t(33) = 5.95$ ,  $p = 5.6 \times 10^{-7}$ ,  $p_{fwe} = 3.4 \times 10^{-6}$ ,  $d = 1.02$ ,  $CI : [0.61, 1.45]$ ; TTC generalized: anterior HPC,

656  $t(33) = 0.36, p = 0.360, p_{fwe} = 1, d = 0.06, CI : [-0.28, 0.40]$ , posterior HPC,  $t(33) = 2.81, p = 0.004, p_{fwe} =$   
657  $0.025, d = 0.48, CI : [0.12, 0.85]$ , caudate,  $t(33) = -0.67, p = 0.746, p_{fwe} = 1, d = -0.11, CI : [-0.46, 0.23]$ ). In  
658 addition, to test which specific subcortical regions were involved in these processes, we conducted  
659 post-hoc ROI analyses for subcortical regions after the whole-brain results were known (one-tailed  
660 one-sample  $t$  tests; TTC-specific: nucleus accumbens:  $t(33) = 4.41, p = 5.2 \times 10^{-5}, p_{fwe} = 2.6 \times 10^{-4}, d =$   
661  $0.76, CI : [0.38, 1.15]$ , globus pallidus:  $t(33) = 7.05, 2.3 \times 10^{-8}, p_{fwe} = 1.1 \times 10^{-7}, d = 1.21, CI : [0.77, 1.67]$ ,  
662 putamen:  $t(33) = 8.07, p = 1.3 \times 10^{-9}, p_{fwe} = 6.5 \times 10^{-9}, d = 1.38, CI : [0.92, 1.88]$ , amygdala:  $t(33) = 1.78, p =$   
663  $0.042, p_{fwe} = 0.212, d = 0.30, CI : [-0.04, 0.66]$ , thalamus:  $t(33) = 2.61, p = 0.007, p_{fwe} = 0.034, d = 0.45, CI :$   
664  $[0.09, 0.81]$ ; TTC-generalized, nucleus accumbens:  $t(33) = 1.82, p = 0.039, p_{fwe} = 0.196, d = 0.31, CI :$   
665  $[-0.04, 0.66]$ , globus pallidus:  $t(33) = 7.06, p = 2.2 \times 10^{-8}, p_{fwe} = 1.1 \times 10^{-7}, d = 1.21, CI : [0.77, 1.68]$ ,  
666 putamen:  $t(33) = 6.21, p = 2.6 \times 10^{-7}, p_{fwe} = 1.3 \times 10^{-6}, d = 1.06, CI : [0.65, 1.50]$ , amygdala:  $t(33) =$   
667  $4.25, p = 8.3 \times 10^{-5}, p_{fwe} = 4.1 \times 10^{-4}, d = 0.73, CI : [0.35, 1.12]$ , thalamus:  $t(33) = 4.05, p = 1.5 \times 10^{-4}, p_{fwe} =$   
668  $7.4 \times 10^{-4}, d = 0.69, CI : [0.32, 1.08]$ ). The subcortical ROIs (Fig. S2B) were based on the FreeSurfer  
669 parcellation as described in the section "Regions of interest definition and analysis".

### 670 Hippocampal functional connectivity as a function of TTC-generalized learning

671 To examine which brain regions whose activity co-fluctuated with the one of the hippocampus dur-  
672 ing TTC-generalized learning, we again conducted a PPI analysis similar to the one described earlier.  
673 A spherical seed ROI with a radius of 4 mm was centered around the hippocampal group-level peak  
674 effect ( $x=-30, y=-24, z=-18$ ) observed for the TTC-generalized learning regressor described above.  
675 To extract the average time course of the seed region, we first conducted a GLM for two regres-  
676 sors of interest: one modeling trials where TTC-generalized learning occurred, and another one  
677 modeling trials where TTC-generalized learning did not. We again added all nuisance regressors as  
678 described before. We then used an F-contrast to detect voxels with significant main effects within  
679 our seed region, and then averaged across these voxels to obtain the final seed time course. In the  
680 second GLM, we then added this time course as the PPI regressor and estimated the element-by-  
681 element product of the task time course and this seed ROI time course. We also included in the PPI  
682 GLM two nuisance regressors accounting for task-related effects from our contrast of interest (Be-  
683 havioral improvements vs. no behavioral improvements) as well as physiological correlations that  
684 could arise due to anatomical connections to the hippocampal seed region or shared subcortical  
685 input. On the group-level, we then tested the weights estimated for our PPI regressor of interest  
686 against zero using a t-test implemented in SPM12. This revealed areas whose activity co-fluctuated  
687 with the one of the hippocampus with as a function TTC-generalized feedback learning.

688 Moreover, we conducted independent ROI analyses for subcortical regions as described in the  
689 section "Regions of interest definition and analysis". Here, we tested the beta estimates obtained  
690 for the hippocampal seed-based PPI regressor of interest (One-tailed one-sample  $t$  tests: caudate:  
691  $t(33) = 1.06, p = 0.149, p_{fwe} = 0.894, d = 0.18, CI : [-0.16, 0.53]$ , putamen:  $t(33) = 2.79, p = 0.004, p_{fwe} =$   
692  $0.026, d = 0.48, CI : [0.12, 0.84]$ , globus pallidus:  $t(33) = 2.52, p = 0.008, p_{fwe} = 0.050, d = 0.43, CI :$   
693  $[0.08, 0.79]$ , amygdala:  $t(33) = 2.60, p = 0.007, p_{fwe} = 0.041, d = 0.45, CI : [0.09, 0.81]$ , nucleus accumbens:  
694  $t(33) = -1.14, p = 0.869, p_{fwe} = 1, d = -0.20, CI : [-0.54, 0.15]$ , thalamus:  $t(33) = 2.71, p = 0.005, p_{fwe} =$   
695  $0.032, d = 0.46, CI : [0.11, 0.83]$ ).

### 696 Brain activity as a function of behavioral performance and as a function of the behavioral 697 regression effect

698 To examine the neural underpinnings governing specificity and generalization in timing behavior  
699 in detail, we analyzed the trial-wise activity of each voxel as a function performance in the TTC task

700 (i.e. the difference between estimated and true TTC in each trial) and as a function of the regression  
701 effect in behavior (i.e. the difference between the estimated TTC and the mean of the sampled in-  
702 tervals, which was 0.82 s). To avoid effects of potential co-linearity between these regressors, we es-  
703 timated model weights using two independent GLMs, which modeled the time course of each trial  
704 with either one of the two regressors. In addition, we again accounted for nuisance variance as de-  
705 scribed before, and all regressors except the realignment parameters and the constant term were  
706 convolved with the canonical HRF of SPM12. After fitting the model, we used the weights estimated  
707 for the two regressors to perform voxel-wise F-tests using SPM12, revealing activity that was cor-  
708 related with these two regressors independent of the sign of the correlation. In addition, we again  
709 performed ROI analyses using two-tailed one-sample t-tests for the anterior and posterior hip-  
710 pocampus (S2A; TTC-task performance: anterior HPC,  $t(33) = 4.85, p = 2.9 \times 10^{-5}, p_{fwe} = 8.7 \times 10^{-5}, d =$   
711  $-0.83, CI : [1.24, 0.44]$ , posterior HPC,  $t(33) = 2.88, p = 0.007, p_{fwe} = 0.021, d = 0.49, CI : [0.86, 0.14]$ ;  
712 Regression effect: anterior HPC,  $t(33) = 5.55, p = 3.6 \times 10^{-6}, p_{fwe} = 1.1 \times 10^{-5}, d = -0.95, CI : [1.37, 0.55]$ ,  
713 posterior HPC,  $t(33) = 1.06, p = 0.295, p_{fwe} = 0.886, d = 0.18, CI : [0.53, 0.16]$ ) as well as for the caudate  
714 (S2B; TTC-task performance:  $t(33) = 5.62, p = 2.9 \times 10^{-6}, p_{fwe} = 8.7 \times 10^{-6}, d = -0.96, CI : [1.39, 0.56]$ ;  
715 Regression effect:  $t(33) = 1.08, p = 0.287, p_{fwe} = 0.859, d = 0.19, CI : [0.16, 0.53]$ ).

#### 716 **Eye tracking: Fixation quality does not affect the interpretation of our results**

717 We used an MR-compatible infrared eye tracker with long-range optics (Eyelink 1000) to monitor  
718 gaze position at a rate of 500 hz during the experiment. After blink removal, the eye tracking  
719 data was linearly detrended, median centered, downsampled to the screen refresh rate of 120  
720 hz and smoothed with a running-average kernel of 100 ms. There were no systematic biases in  
721 fixation error across speeds (Fig. S6A; Kruskal-Wallis test:  $\chi(2) = 0.608, p = 0.895, \epsilon^2 = 0.005, CI :$   
722  $[0.00, 0.06]$ ) or across feedback levels (Fig. S6B;  $\chi(2) = 0.190, p = 0.909, \epsilon^2 = 0.0019, CI : [0.00, 0.10]$ ).  
723 Moreover, differences in fixation error could neither explain individual differences in absolute TTC  
724 error (Fig. S6C; Spearman's  $\rho = 0.167, p = 0.344$ ), nor individual differences in the regression effect  
725 in behavior (Fig. S6C; Spearman's  $\rho = 0.26, p = 0.131$ ).

## 726 References

- 727 Acerbi, L., Wolpert, D. M., & Vijayakumar, S. (2012). Internal Representations of Temporal Statistics and Feedback Calibrate Motor-  
728 Sensory Interval Timing. *PLoS Computational Biology*, 8(11), e1002771. doi: 10.1371/journal.pcbi.1002771
- 729 Aly, M., & Turk-Browne, N. B. (2017). How hippocampal memory shapes, and is shaped by, attention. In D. E. Hannula & M. C. Duff  
730 (Eds.), *The hippocampus from cells to systems: Structure, connectivity, and functional contributions to memory and flexible cognition* (pp.  
731 369–403). Cham: Springer International Publishing. doi: 10.1007/978-3-319-50406-3\_12
- 732 Bakhurin, K. I., Goudar, V., Shobe, J. L., Claar, L. D., Buonomano, D. V., & Masmanidis, S. C. (2017). Differential encoding of time by  
733 prefrontal and striatal network dynamics. *Journal of Neuroscience*, 37(4), 854–870. doi: 10.1523/JNEUROSCI.1789-16.2016
- 734 Barnett, A. J., O'Neil, E. B., Watson, H. C., & Lee, A. C. (2014). The human hippocampus is sensitive to the durations of events and  
735 intervals within a sequence. *Neuropsychologia*, 64, 1–12. doi: 10.1016/j.neuropsychologia.2014.09.011
- 736 Behrens, T. E., Muller, T. H., Whittington, J. C., Mark, S., Baram, A. B., Stachenfeld, K. L., & Kurth-Nelson, Z. (2018). What Is a Cognitive  
737 Map? Organizing Knowledge for Flexible Behavior. *Neuron*, 100(2), 490–509. doi: 10.1016/j.neuron.2018.10.002
- 738 Bellmund, J. L., Polti, I., & Doeller, C. F. (2020). Sequence memory in the hippocampal–entorhinal region. *Journal of Cognitive Neuro-*  
739 *science*, 32(11), 2056–2070. doi: 10.1162/jocn\_a\_01592
- 740 Bellmund, J. L. S., Deuker, L., Montijn, N. D., & Doeller, C. F. (2021, April). *Structuring time: The hippocampus constructs sequence memories*  
741 *that generalize temporal relations across experiences* (preprint). Neuroscience. Retrieved 2021-07-09, from [http://biorxiv.org/  
742 lookup/doi/10.1101/2021.04.23.440002](http://biorxiv.org/lookup/doi/10.1101/2021.04.23.440002) doi: 10.1101/2021.04.23.440002
- 743 Berke, J. D., Okatan, M., Skurski, J., & Eichenbaum, H. B. (2004). Oscillatory entrainment of striatal neurons in freely moving rats.  
744 *Neuron*, 43(6), 883–896. doi: 10.1016/j.neuron.2004.08.035
- 745 Bostan, A. C., & Strick, P. L. (2018). The basal ganglia and the cerebellum: Nodes in an integrated network. *Nature Reviews Neuroscience*,  
746 19(6), 338–350. doi: 10.1038/s41583-018-0002-7
- 747 Brown, T. I., & Stern, C. E. (2014). Contributions of medial temporal lobe and striatal memory systems to learning and retrieving  
748 overlapping spatial memories. *Cerebral Cortex*, 24(7), 1906–1922. doi: 10.1093/cercor/bht041
- 749 Burgess, N., Maguire, E., & O'Keefe, J. (2002). The Human Hippocampus and Spatial and Episodic Memory. *Neuron*, 35(4), 625–641.  
750 doi: [https://doi.org/10.1016/S0896-6273\(02\)00830-9](https://doi.org/10.1016/S0896-6273(02)00830-9)
- 751 Chang, C. J., & Jazayeri, M. (2018). Integration of speed and time for estimating time to contact. *Proceedings of the National Academy of*  
752 *Sciences of the United States of America*, 115(12), E2879–E2887. doi: 10.1073/pnas.1713316115
- 753 Cheng, D. T., Disterhoft, J. F., Power, J. M., Ellis, D. A., & Desmond, J. E. (2008). Neural substrates underlying human delay and trace  
754 eyeblink conditioning. *Proceedings of the National Academy of Sciences of the United States of America*, 105(23), 8108–8113. doi:  
755 10.1073/pnas.0800374105
- 756 Chersi, F., & Burgess, N. (2015). The Cognitive Architecture of Spatial Navigation: Hippocampal and Striatal Contributions. *Neuron*,  
757 88(1), 64–77. doi: 10.1016/j.neuron.2015.09.021
- 758 Cohen, M. X., & Ranganath, C. (2007). Reinforcement learning signals predict future decisions. *Journal of Neuroscience*, 27(2), 371–378.  
759 doi: 10.1523/JNEUROSCI.4421-06.2007
- 760 Cox, J., & Witten, I. B. (2019). Striatal circuits for reward learning and decision-making. *Nature Reviews Neuroscience*, 20(8), 482–494.  
761 doi: 10.1038/s41583-019-0189-2
- 762 Dall'érac, G., Graupner, M., Knippenberg, J., Martinez, R. C. R., Tavares, T. F., Tallot, L., ... Doyère, V. (2017). Updating temporal  
763 expectancy of an aversive event engages striatal plasticity under amygdala control. *Nature Communications*, 8(1), 13920. doi:  
764 10.1038/ncomms13920
- 765 Daw, N. D., & Dayan, P. (2014). The algorithmic anatomy of model-based evaluation. *Philosophical Transactions of the Royal Society B:*  
766 *Biological Sciences*, 369(1655), 20130478. doi: 10.1098/rstb.2013.0478
- 767 de Azevedo Neto, R. M., & Amaro Júnior, E. (2018). Bilateral dorsal fronto-parietal areas are associated with integration of visual  
768 motion information and timed motor action. *Behavioural Brain Research*, 337, 91–98. doi: 10.1016/j.bbr.2017.09.046
- 769 Deuker, L., Bellmund, J. L., Navarro Schröder, T., & Doeller, C. F. (2016). An event map of memory space in the hippocampus. *eLife*, 5,  
770 e16534. doi: 10.7554/eLife.16534
- 771 Dickerson, K. C., & Delgado, M. R. (2015). Contributions of the hippocampus to feedback learning. *Cognitive, Affective, & Behavioral*  
772 *Neuroscience*, 15(4), 861–877. doi: 10.3758/s13415-015-0364-5
- 773 Doeller, C. F., King, J. A., & Burgess, N. (2008). Parallel striatal and hippocampal systems for landmarks and boundaries in spatial  
774 memory. *Proceedings of the National Academy of Sciences of the United States of America*, 105(15), 5915–5920. doi: 10.1073/pnas  
775 .0801489105
- 776 Eichenbaum, H. (2014). Time cells in the hippocampus: A new dimension for mapping memories. *Nature Reviews Neuroscience*, 15(11),  
777 732–744. doi: 10.1038/nrn3827
- 778 Epstein, R. A., & Baker, C. I. (2019). Scene Perception in the Human Brain. *Annual Review of Vision Science*, 5(1), 373–397. doi: 10.1146/  
779 annurev-vision-091718-014809

- 780 Ferbinteanu, J. (2020). The hippocampus and dorsolateral striatum integrate distinct types of memories through time and space,  
781 respectively. *Journal of Neuroscience*, *40*(47), 9055–9065. doi: 10.1523/JNEUROSCI.1084-20.2020
- 782 Foerde, K., & Shohamy, D. (2011). Feedback timing modulates brain systems for learning in humans. *Journal of Neuroscience*, *31*(37),  
783 13157–13167. doi: 10.1523/JNEUROSCI.2701-11.2011
- 784 Friston, K., FitzGerald, T., Rigoli, F., Schwartenbeck, P., & Pezzulo, G. (2016). Active {Inference}: {A} {Process} {Theory}. *Neural Compu-  
785 tation*, *29*(1), 1–49. doi: 10.1162/NECO\_a\_00912
- 786 Gahnstrom, C. J., & Spiers, H. J. (2020). Striatal and hippocampal contributions to flexible navigation in rats and humans. *Brain and  
787 Neuroscience Advances*, *4*, 239821282097977. doi: 10.1177/2398212820979772
- 788 Gauthier, B., Pestke, K., & van Wassenhove, V. (2019). Building the Arrow of Time... Over Time: A Sequence of Brain Activity Mapping  
789 Imagined Events in Time and Space. *Cerebral Cortex*, *29*(10), 4398–4414. doi: 10.1093/cercor/bhy320
- 790 Gauthier, B., Prabhu, P., Kotegar, K. A., & van Wassenhove, V. (2020). Hippocampal contribution to ordinal psychological time in the  
791 human brain. *Journal of Cognitive Neuroscience*, *32*(11), 2071–2086. doi: 10.1162/jocn\_a\_01586
- 792 Geerts, J. P., Chersi, F., Stachenfeld, K. L., & Burgess, N. (2020). A general model of hippocampal and dorsal striatal learning and  
793 decision making. *Proceedings of the National Academy of Sciences of the United States of America*, *117*(49), 31427–31437. doi: 10.1073/  
794 pnas.2007981117
- 795 Gershman, S. J., Moustafa, A. A., & Ludvig, E. A. (2014). Time representation in reinforcement learning models of the basal ganglia.  
796 *Frontiers in Computational Neuroscience*, *7*(JAN). doi: 10.3389/fncom.2013.00194
- 797 Gibbon, J. (1977). Scalar expectancy theory and Weber's law in animal timing. *Psychological Review*, *84*(3), 279–325. doi: 10.1037/  
798 0033-295X.84.3.279
- 799 Goodroe, S. C., Starnes, J., & Brown, T. I. (2018). The Complex Nature of Hippocampal-Striatal Interactions in Spatial Navigation.  
800 *Frontiers in Human Neuroscience*, *12*. doi: 10.3389/fnhum.2018.00250
- 801 Gouvêa, T. S., Monteiro, T., Motiwala, A., Soares, S., Machens, C., & Paton, J. J. (2015). Striatal dynamics explain duration judgments.  
802 *eLife*, *4*(December2015), e11386. doi: 10.7554/eLife.11386
- 803 Grahn, J. A., Parkinson, J. A., & Owen, A. M. (2008). The cognitive functions of the caudate nucleus. *Progress in Neurobiology*, *86*(3),  
804 141–155. doi: 10.1016/j.pneurobio.2008.09.004
- 805 Hartley, T., Maguire, E. A., Spiers, H. J., & Burgess, N. (2003). The Well-Worn Route and the Path Less Traveled: Distinct Neural Bases  
806 of Route Following and Wayfinding in Humans. *Neuron*, *37*(5), 877–888. doi: 10.1016/S0896-6273(03)00095-3
- 807 Hinton, S. C., & Meck, W. H. (2004). Frontal-striatal circuitry activated by human peak-interval timing in the supra-seconds range.  
808 *Cognitive Brain Research*, *21*(2), 171–182. doi: 10.1016/j.cogbrainres.2004.08.005
- 809 Howard, M. W. (2017). Temporal and spatial context in the mind and brain. *Current Opinion in Behavioral Sciences*, *17*, 14–19. doi:  
810 10.1016/j.cobeha.2017.05.022
- 811 Huang, Y., & Rao, R. P. (2011). Predictive coding. *Wiley Interdisciplinary Reviews: Cognitive Science*, *2*(5), 580–593. doi: 10.1002/wcs.142
- 812 Hunnicutt, B. J., Jongbloets, B. C., Birdsong, W. T., Gertz, K. J., Zhong, H., & Mao, T. (2016). A comprehensive excitatory input map of  
813 the striatum reveals novel functional organization. *eLife*, *5*(November2016), e19103. doi: 10.7554/eLife.19103
- 814 Jazayeri, M., & Shadlen, M. N. (2010). Temporal context calibrates interval timing. *Nature Neuroscience*, *13*(8), 1020–1026. doi: 10.1038/  
815 nn.2590
- 816 Kahnt, T., & Tobler, P. N. (2016). Dopamine regulates stimulus generalization in the human hippocampus. *eLife*, *5*, e12678. doi:  
817 10.7554/eLife.12678
- 818 Kaplan, R., Schuck, N. W., & Doeller, C. F. (2017). The Role of Mental Maps in Decision-Making. *Trends in Neurosciences*, *40*(5), 256–259.  
819 doi: 10.1016/j.tins.2017.03.002
- 820 Kragel, J. E., Schuele, S., VanHaerents, S., Rosenow, J. M., & Voss, J. L. (2021). Rapid coordination of effective learning by the human  
821 hippocampus. *Science Advances*, *7*(25). doi: 10.1126/sciadv.abf7144
- 822 Kubota, Y., Liu, J., Hu, D., DeCoteau, W. E., Eden, U. T., Smith, A. C., & Graybiel, A. M. (2009). Stable encoding of task structure  
823 coexists with flexible coding of task events in sensorimotor striatum. *Journal of Neurophysiology*, *102*(4), 2142–2160. doi: 10.1152/  
824 jn.00522.2009
- 825 Kumaran, D. (2012). What representations and computations underpin the contribution of the hippocampus to generalization and  
826 inference? *Frontiers in Human Neuroscience*, *6*. doi: 10.3389/fnhum.2012.00157
- 827 Lee, D., Seo, H., & Jung, M. W. (2012). Neural basis of reinforcement learning and decision making. *Annual Review of Neuroscience*, *35*,  
828 287–308. doi: 10.1146/annurev-neuro-062111-150512
- 829 LeGates, T. A., Kvarta, M. D., Tooley, J. R., Francis, T. C., Lobo, M. K., Creed, M. C., & Thompson, S. M. (2018). Reward behaviour is  
830 regulated by the strength of hippocampus–nucleus accumbens synapses. *Nature*, *564*(7735), 258–262. doi: 10.1038/s41586-018-  
831 -0740-8
- 832 MacDonald, C. J., Lepage, K. Q., Eden, U. T., & Eichenbaum, H. (2011). Hippocampal "time cells" bridge the gap in memory for discon-  
833 tinuous events. *Neuron*, *71*(4), 737–749. doi: 10.1016/j.neuron.2011.07.012



- 834 Malapani, C., Deweer, B., & Gibbon, J. (2002). Separating storage from retrieval dysfunction of temporal memory in Parkinson's disease.  
835 *Journal of Cognitive Neuroscience*, 14(2), 311–322. doi: 10.1162/089892902317236920
- 836 Malapani, C., Rakitin, B., Levy, R., Meck, W. H., Deweer, B., Dubois, B., & Gibbon, J. (1998). Coupled temporal memories in Parkinson's  
837 disease: A dopamine-related dysfunction. *Journal of Cognitive Neuroscience*, 10(3), 316–331. doi: 10.1162/089892998562762
- 838 Mattfeld, A. T., & Stark, C. E. L. (2015). Functional contributions and interactions between the human hippocampus and subregions of  
839 the striatum during arbitrary associative learning and memory. *Hippocampus*, 25(8), 900–911. doi: 10.1002/hipo.22411
- 840 Meck, W. H., Church, R. M., & Olton, D. S. (1984). Hippocampus, time, and memory. *Behavioral Neuroscience*, 98(1), 3–22. doi:  
841 10.1037/0735-7044.98.1.3
- 842 Mello, G. B., Soares, S., & Paton, J. J. (2015). A scalable population code for time in the striatum. *Current Biology*, 25(9), 1113–1122. doi:  
843 10.1016/j.cub.2015.02.036
- 844 Momennejad, I. (2020). Learning Structures: Predictive Representations, Replay, and Generalization. *Current Opinion in Behavioral  
845 Sciences*, 32, 155–166. doi: 10.1016/j.cobeha.2020.02.017
- 846 Montchal, M. E., Reagh, Z. M., & Yassa, M. A. (2019). Precise temporal memories are supported by the lateral entorhinal cortex in  
847 humans. *Nature Neuroscience*, 22(2), 284–288. doi: 10.1038/s41593-018-0303-1
- 848 Nau, M., Julian, J. B., & Doeller, C. F. (2018). How the Brain's Navigation System Shapes Our Visual Experience. *Trends in Cognitive  
849 Sciences*, 22(9), 810–825. doi: 10.1016/j.tics.2018.06.008
- 850 Nau, M., Navarro Schröder, T., Bellmund, J. L., & Doeller, C. F. (2018a). Hexadirectional coding of visual space in human entorhinal  
851 cortex. *Nature Neuroscience*, 21(2), 188–190. doi: 10.1038/s41593-017-0050-8
- 852 Nobre, A. C., & van Ede, F. (2018). Anticipated moments: temporal structure in attention. *Nature Reviews Neuroscience*, 19(1). doi:  
853 10.1038/nrn.2017.141
- 854 Palombo, D. J., & Verfaellie, M. (2017). Hippocampal contributions to memory for time: evidence from neuropsychological studies.  
855 *Current Opinion in Behavioral Sciences*, 17, 107–113. doi: 10.1016/j.cobeha.2017.07.015
- 856 Paton, J. J., & Buonomano, D. V. (2018). The Neural Basis of Timing: Distributed Mechanisms for Diverse Functions. *Neuron*, 98(4),  
857 687–705. doi: 10.1016/j.neuron.2018.03.045
- 858 Peer, M., Brunec, I. K., Newcombe, N. S., & Epstein, R. A. (2021). Structuring Knowledge with Cognitive Maps and Cognitive Graphs.  
859 *Trends in Cognitive Sciences*, 25(1), 37–54. doi: 10.1016/j.tics.2020.10.004
- 860 Petter, E. A., Gershman, S. J., & Meck, W. H. (2018). Integrating Models of Interval Timing and Reinforcement Learning. *Trends in  
861 Cognitive Sciences*, 22(10), 911–922. doi: 10.1016/j.tics.2018.08.004
- 862 Petzschner, F. H., Glasauer, S., & Stephan, K. E. (2015). A Bayesian perspective on magnitude estimation. *Trends in Cognitive Sciences*,  
863 19(5), 285–293. doi: 10.1016/j.tics.2015.03.002
- 864 Poppenk, J., Evensmoen, H. R., Moscovitch, M., & Nadel, L. (2013). Long-axis specialization of the human hippocampus. *Trends in  
865 Cognitive Sciences*, 17(5), 230–240. doi: 10.1016/j.tics.2013.03.005
- 866 Rakitin, B. C., Penney, T. B., Gibbon, J., Malapani, C., Hinton, S. C., & Meck, W. H. (1998). Scalar expectancy theory and peak-interval  
867 timing in humans. *Journal of Experimental Psychology: Animal Behavior Processes*, 24(1), 15–33. doi: 10.1037/0097-7403.24.1.15
- 868 Richards, W. (1973). Time reproductions by H.M. *Acta Psychologica*, 37(4), 279–282. doi: 10.1016/0001-6918(73)90020-6
- 869 Samejima, K., Ueda, Y., Doya, K., & Kimura, M. (2005). Neuroscience: Representation of action-specific reward values in the striatum.  
870 *Science*, 310(5752), 1337–1340. doi: 10.1126/science.1115270
- 871 Schapiro, A. C., Turk-Browne, N. B., Botvinick, M. M., & Norman, K. A. (2017). Complementary learning systems within the hippocampus:  
872 a neural network modelling approach to reconciling episodic memory with statistical learning. *Philosophical Transactions of the Royal  
873 Society B: Biological Sciences*, 372(1711), 20160049. doi: 10.1098/rstb.2016.0049
- 874 Schiller, D., Eichenbaum, H., Buffalo, E. A., Davachi, L., Foster, D. J., Leutgeb, S., & Ranganath, C. (2015). Memory and space: Towards  
875 an understanding of the cognitive map. *Journal of Neuroscience*, 35(41), 13904–13911. doi: 10.1523/JNEUROSCI.2618-15.2015
- 876 Schlichting, M. L., & Preston, A. R. (2015). Memory integration: neural mechanisms and implications for behavior. *Current Opinion in  
877 Behavioral Sciences*, 1, 1–8. doi: 10.1016/j.cobeha.2014.07.005
- 878 Schönberg, T., Daw, N. D., Joel, D., & O'Doherty, J. P. (2007). Reinforcement learning signals in the human striatum distinguish learners  
879 from nonlearners during reward-based decision making. *Journal of Neuroscience*, 27(47), 12860–12867. doi: 10.1523/JNEUROSCI  
880 .2496-07.2007
- 881 Schuck, N. W., & Niv, Y. (2019). Sequential replay of nonspatial task states in the human hippocampus. *Science*, 364(6447). doi:  
882 10.1126/science.aaw5181
- 883 Shi, Z., Church, R. M., & Meck, W. H. (2013). Bayesian optimization of time perception. *Trends in Cognitive Sciences*, 17(11), 556–564.  
884 doi: 10.1016/j.tics.2013.09.009
- 885 Shikano, Y., Ikegaya, Y., & Sasaki, T. (2021). Minute-encoding neurons in hippocampal-striatal circuits. *Current Biology*, 0(0), 1438-  
886 1449.e6. doi: 10.1016/j.cub.2021.01.032

- 887 Shimbo, A., Izawa, E.-I., & Fujisawa, S. (2021). Scalable representation of time in the hippocampus. *Science Advances*, 7(6), eabd7013.  
888 doi: 10.1126/sciadv.abd7013
- 889 Shohamy, D., & Wagner, A. D. (2008). Integrating Memories in the Human Brain: Hippocampal-Midbrain Encoding of Overlapping  
890 Events. *Neuron*, 60(2), 378–389. doi: 10.1016/j.neuron.2008.09.023
- 891 Suzuki, T. W., & Tanaka, M. (2019). Neural oscillations in the primate caudate nucleus correlate with different preparatory states for  
892 temporal production. *Communications Biology*, 2(1), 1–9. doi: 10.1038/s42003-019-0345-2
- 893 Thavabalasingam, S., O'Neil, E. B., & Lee, A. C. (2018). Multivoxel pattern similarity suggests the integration of temporal duration in  
894 hippocampal event sequence representations. *NeuroImage*, 178, 136–146. doi: 10.1016/j.neuroimage.2018.05.036
- 895 Thavabalasingam, S., O'Neil, E. B., Tay, J., Nestor, A., & Lee, A. C. (2019). Evidence for the incorporation of temporal duration information  
896 in human hippocampal long-term memory sequence representations. *Proceedings of the National Academy of Sciences of the United  
897 States of America*, 116(13), 6407–6414. doi: 10.1073/pnas.1819993116
- 898 Umbach, G., Katak, P., Jacobs, J., Kahana, M., Pfeiffer, B. E., Sperling, M., & Lega, B. (2020). Time cells in the human hippocampus and  
899 entorhinal cortex support episodic memory. *Proceedings of the National Academy of Sciences of the United States of America*, 117(45),  
900 28463–28474. doi: 10.1073/pnas.2013250117
- 901 van de Ven, V., Lee, C., Lifanov, J., Kochs, S., Jansma, H., & Weerd, P. D. (2020). Hippocampal-striatal functional connectivity supports  
902 processing of temporal expectations from associative memory. *Hippocampus*, 30(9), 926–937. doi: <https://doi.org/10.1002/hipo>  
903 .23205
- 904 Vikbladh, O. M., Meager, M. R., King, J., Blackmon, K., Devinsky, O., Shohamy, D., ... Daw, N. D. (2019). Hippocampal Contributions to  
905 Model-Based Planning and Spatial Memory. *Neuron*, 102(3), 683–693.e4. doi: 10.1016/j.neuron.2019.02.014
- 906 Wang, J., Narain, D., Hosseini, E. A., & Jazayeri, M. (2018). Flexible timing by temporal scaling of cortical responses. *Nature Neuroscience*,  
907 21(1), 102–112. doi: 10.1038/s41593-017-0028-6
- 908 Whittington, J. C. R., Muller, T. H., Mark, S., Chen, G., Barry, C., Burgess, N., & Behrens, T. E. J. (2020). The Tolman-Eichenbaum  
909 Machine: Unifying Space and Relational Memory through Generalization in the Hippocampal Formation. *Cell*, 183(5). doi: 10.1016/  
910 j.cell.2020.10.024
- 911 Wikenheiser, A. M., Marrero-Garcia, Y., & Schoenbaum, G. (2017). Suppression of Ventral Hippocampal Output Impairs Integrated  
912 Orbitofrontal Encoding of Task Structure. *Neuron*, 95(5), 1197–1207.e3. doi: 10.1016/j.neuron.2017.08.003
- 913 Wimmer, G. E., Daw, N. D., & Shohamy, D. (2012). Generalization of value in reinforcement learning by humans. *European Journal of  
914 Neuroscience*, 35(7), 1092–1104. doi: 10.1111/j.1460-9568.2012.08017.x
- 915 Wirth, S., Avsar, E., Chiu, C. C., Sharma, V., Smith, A. C., Brown, E., & Suzuki, W. A. (2009). Trial Outcome and Associative Learning  
916 Signals in the Monkey Hippocampus. *Neuron*, 61(6), 930–940. doi: 10.1016/j.neuron.2009.01.012
- 917 Wittmann, B. C., Schott, B. H., Guderian, S., Frey, J. U., Heinze, H. J., & Düzel, E. (2005). Reward-related fMRI activation of dopaminergic  
918 midbrain is associated with enhanced hippocampus-dependent long-term memory formation. *Neuron*, 45(3), 459–467. doi: 10  
919 .1016/j.neuron.2005.01.010
- 920 Wolpert, D. M., Diedrichsen, J., & Flanagan, J. R. (2011). Principles of sensorimotor learning. *Nature Reviews Neuroscience*, 12(12),  
921 739–751. doi: 10.1038/nrn3112
- 922 Yin, B., & Troger, A. B. (2011). Exploring the 4th dimension: Hippocampus, time, and memory revisited. *Frontiers in Integrative  
923 Neuroscience*, 5. doi: 10.3389/fnint.2011.00036

924 **Supplementary Material**

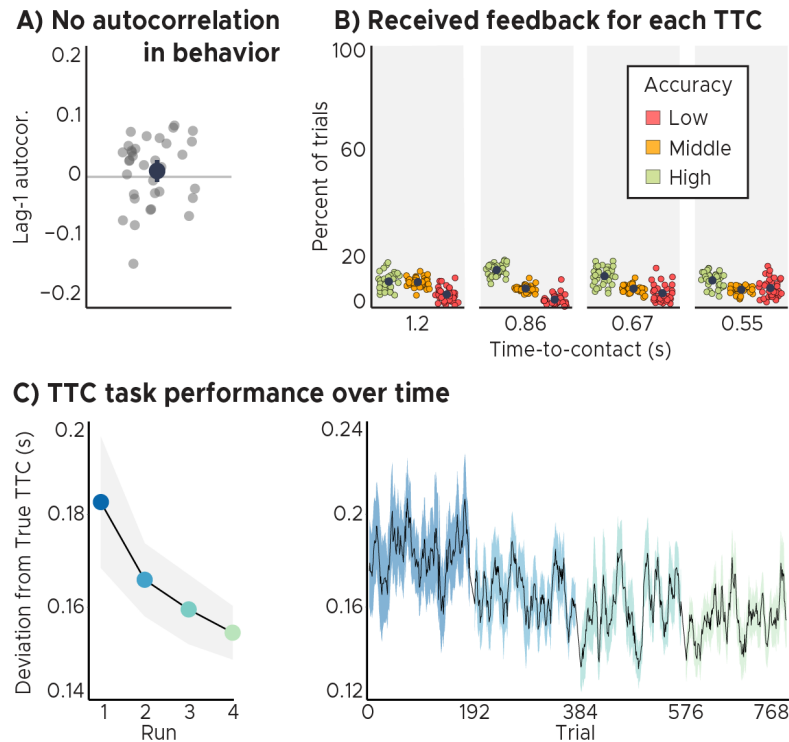

**Figure S1: Behavioral analyses.** A) Behavioral autocorrelation analysis. We did not observe a correlation between subsequent trials in the feedback participants received. The feedback and thus behavioral performance in one trial did therefore not predict feedback or performance in the following trial. B) Feedback distributions for all speed levels. Participant's received approximately the same feedback for all speed levels and thus for all target TTCs. AB) Depicted are the mean and SEM across participants (black dot and line) overlaid on single participant data (dots). C) TTC task performance over time. Left panel: Across-trial-average performance over scanning runs. Right panel: task performance over trials. We plot the mean (black line) and SEM (shaded area) across participants. Run identity color coded. Participants' task performance improved over time.

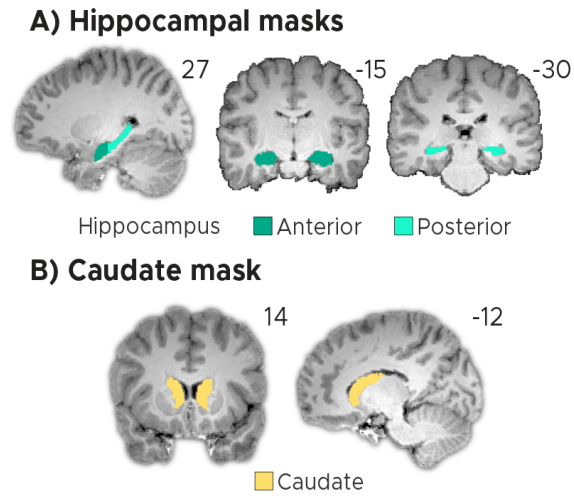

**Figure S2: Regions of interest (ROIs). A) Anterior and posterior hippocampal ROIs. B) Caudate ROI. AB) ROIs shown for a sample participant superimposed onto the skull-stripped structural T1-scan of that participant. These masks were created using FreeSurfer's cortical and subcortical parcellation.**

### Trial-phase specific relationship between brain activity & behavior

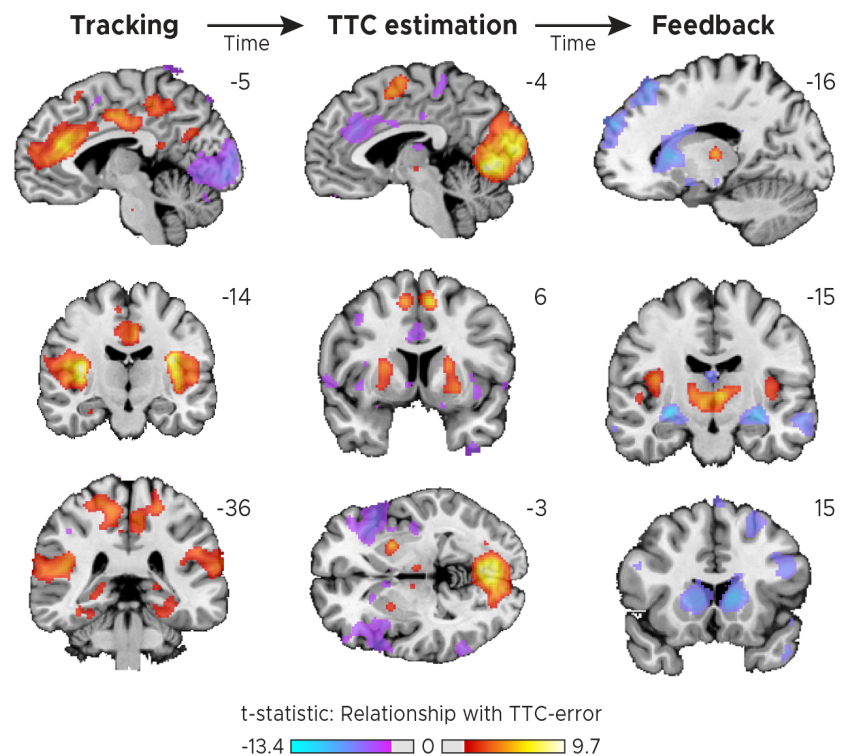

**Figure S3: Trial-phase specific relationship between brain activity and behavior.** We repeated the voxel-wise mass-univariate general linear model analysis for performance in the current trial (Fig. 2) for each of the three trial phases individually. This included the tracking phase (in which the fixation target moved), the TTC-estimation phase (in which the fixation target had stopped and participants estimated the TTC) and the feedback phase (in which participants received feedback about how accurately they had estimated the TTC). We plot thresholded t-test results at 1mm resolution overlaid on a structural template brain. Positive t-scores indicate a positive relationship between brain activity and TTC-error.



### A) Distinct networks update duration-specific and generalized task information

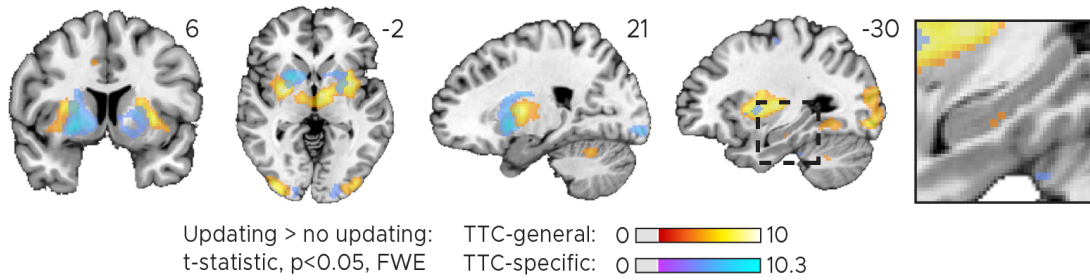

### B) Subcortical ROIs

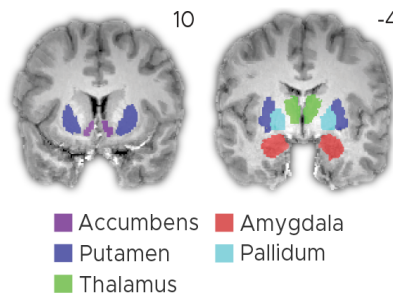

### C) Subcortical regions

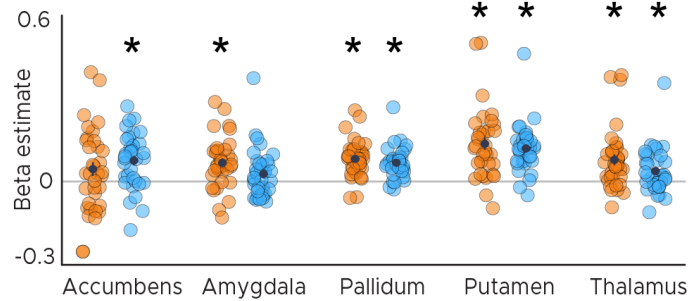

**Figure S4: Distinct networks support TTC-specific and TTC-generalized feedback learning.** A) Voxel-wise mass-univariate GLM results for TTC-generalized and TTC-specific parametric regressors. We plot thresholded t-test results at 1mm resolution at  $p < 0.05$  whole-brain FWE-corrected levels. Activity maps were overlaid on a structural template brain. Positive t-scores indicate a relationship between brain activity and the updating of either TTC-specific or TTC-generalized information respectively. Insert zooming in on hippocampus and MNI coordinates added. B) Subcortical regions-of-interest (ROIs) for the nucleus accumbens, the amygdala, the thalamus, the caudate, the putamen and the pallidum. All ROIs are shown for a sample participant superimposed onto the skull-stripped structural T1-scan of that participant. They were created using FreeSurfer's cortical and subcortical parcellation. C) ROI-analysis results for subcortical regions for TTC-generalized (orange dots) and TTC-specific regressors (blue dots). Depicted are the mean and SEM across participants (black dot and line) overlaid on single participant data. Statistics reflect  $p < 0.05$  at Bonferroni-corrected levels (\*) obtained using a group-level one-tailed one-sample t-test against zero.

### A) TTC-generalized hippocampal connectivity to subcortex

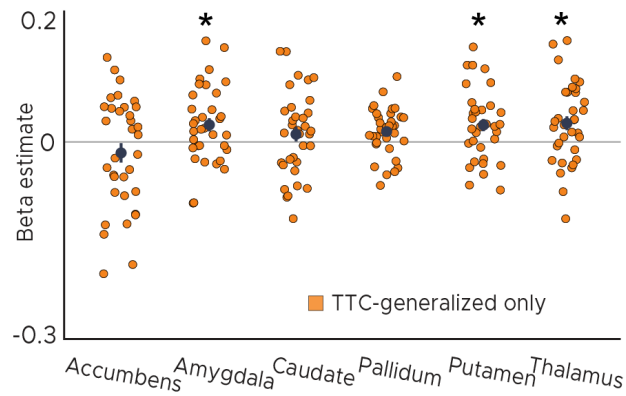

### B) Whole-brain TTC-generalized hippocampal connectivity

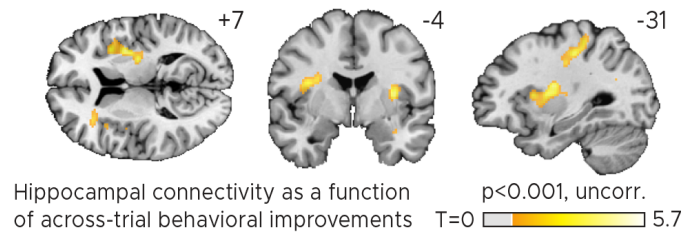

**Figure S5: TTC-generalized hippocampal connectivity.** A) Regions of interest analysis for subcortical regions estimated using a Psychophysiological-interactions (PPI) analysis conducted using the hippocampal effect in Fig.4A as a seed. Positive beta estimates indicate that functional connectivity between each ROI and the hippocampal seed depended on how much participants TTC-task performance improved across trials. Depicted are the mean and SEM across participants (black dot and line) overlaid on single participant data for the nucleus accumbens, the amygdala, the caudate, the globus pallidum, the putamen and the thalamus. Statistics reflect  $p < 0.05$  at Bonferroni-corrected levels (\*) obtained using a group-level one-tailed one-sample t-test against zero. B) Whole-brain voxel-wise t-test results for the TTC-generalized hippocampal connectivity overlaid on a structural template brain at 1mm resolution. MNI coordinates added.

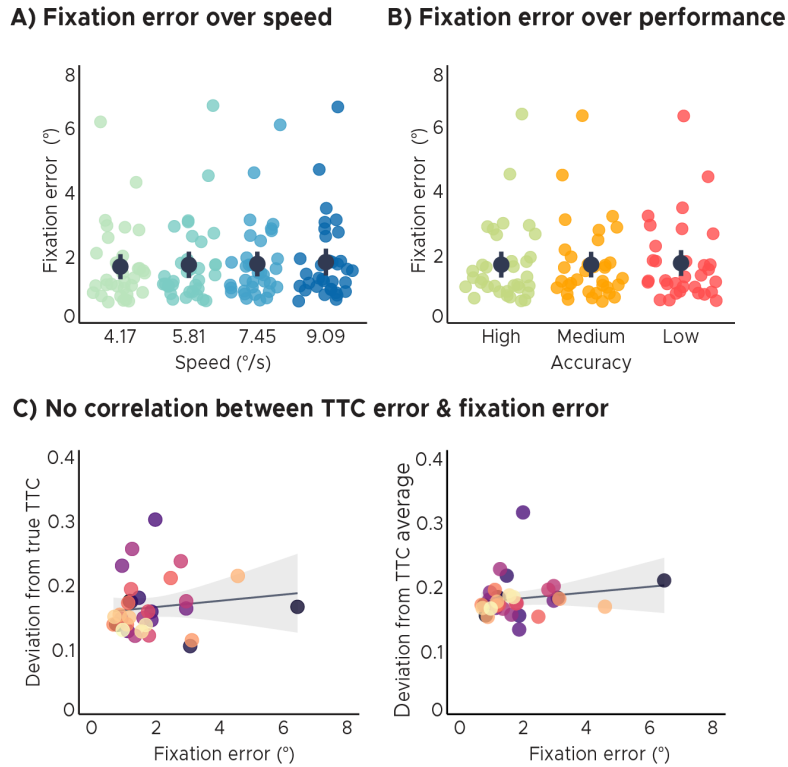

**Figure S6: Eye tracking analyses. A) Fixation error over speed. There were no significant differences in fixation error across speed levels and thus across target TTC's. B) Fixation error over TTC-task performance. There were no significant differences in fixation error across TTC-task performance levels. C) No correlation of TTC-task performance or the behavioral regression-to-the-mean effect with fixation error. Fixation quality does not affect the interpretation of the imaging results presented in this study. Each dot represents a single participant. Regression line (black) and standard error (gray shade). AB) Group-level mean and SEM depicted as black dot and line overlaid on single participant data.**
